1 **NeutrobodyPlex - Nanobodies to monitor a SARS-CoV-2 neutralizing immune response**

2

3 *Teresa R. Wagner<sup>1,2</sup>, Philipp D. Kaiser<sup>2</sup>, Marius Gramlich<sup>2</sup>, Matthias Becker<sup>2</sup>, Bjoern Traenkle<sup>2</sup>,*  
4 *Daniel Junker<sup>2</sup>, Julia Haering<sup>2</sup>, Stefan Nueske<sup>3</sup>, Armin Scholz<sup>3</sup>, Anne Zeck<sup>2</sup>, Katja Schenke-*  
5 *Layland<sup>2,4,6,7</sup>, Annika Nelde<sup>8,9</sup>, Monika Strengert<sup>11,12</sup>, Gérard Krause<sup>11,12</sup>, Juliane S. Walz<sup>4,8,9,10</sup>,*  
6 *Natalia Ruetalo<sup>5</sup>, Michael Schindler<sup>5</sup>, Nicole Schneiderhan-Marra<sup>2</sup> and Ulrich Rothbauer<sup>1,2#</sup>*

7

8 **Addresses**

9 <sup>1</sup> Pharmaceutical Biotechnology, Eberhard Karls University Tuebingen, Germany

10 <sup>2</sup> Natural and Medical Sciences Institute at the University of Tuebingen, Germany

11 <sup>3</sup> Livestock Center of the Faculty of Veterinary Medicine, Ludwig Maximilians University  
12 Munich, Oberschleissheim, Germany

13 <sup>4</sup> Cluster of Excellence iFIT (EXC2180) “Image-Guided and Functionally Instructed Tumor  
14 Therapies”, University of Tuebingen, Tuebingen, Germany

15 <sup>5</sup> Institute for Medical Virology and Epidemiology of Viral Diseases, University Hospital,  
16 Tuebingen, Germany

17 <sup>6</sup> Department of Women’s Health, Research Institute for Womens’s Health, Eberhard-Karls-  
18 University, Tuebingen, Germany

19 <sup>7</sup> Department of Medicine/Cardiology, Cardiovascular Research Laboratories, David Geffen  
20 School of Medicine at UCLA, Los Angeles, CA, USA

21 <sup>8</sup> Clinical Collaboration Unit Translational Immunology, German Cancer Consortium (DKTK),  
22 Department of Internal Medicine, University Hospital Tuebingen, Tuebingen, Germany

23 <sup>9</sup> Institute for Cell Biology, Department of Immunology, University of Tuebingen, Tuebingen,  
24 Germany

25 <sup>10</sup> Department of Hematology, Oncology, Clinical Immunology and Rheumatology, University  
26 Hospital Tuebingen, Tuebingen, Germany

27 <sup>11</sup> Department of Epidemiology, Helmholtz Centre for Infection Research, Braunschweig,  
28 Germany

29 <sup>12</sup> TWINCORE GmbH, Centre for Experimental and Clinical Infection Research, a joint venture  
30 of the Hannover Medical School and the Helmholtz Centre for Infection Research, Hannover,  
31 Germany

32

33 # corresponding author

34

35 Correspondence:

36 Prof. Dr. Ulrich Rothbauer, Natural and Medical Sciences Institute at the University of  
37 Tuebingen

38 Markwiesenstr. 55, 72770 Reutlingen, Germany.

39 E-mail: [ulrich.rothbauer@uni-tuebingen.de](mailto:ulrich.rothbauer@uni-tuebingen.de)

40 Phone: +49 7121 51530-415

41 Fax: +49 7121 51530-816

42 Ocid ID: 0000-0001-5923-8986

43

44 **Abstract**

45 Facing the worldwide disease progression of COVID-19 caused by the SARS-CoV-2 virus, the  
46 situation is highly critical and there is an unmet need for effective vaccination, reliable diagnosis  
47 and therapeutic intervention. Neutralizing binding molecules such as antibodies or derivatives  
48 thereof have become important tools for acute treatment of COVID-19. Additionally, such  
49 binders provide the unique possibility to monitor the emergence and presence of a neutralizing  
50 immune response in infected or vaccinated individuals. Here we describe a set of 11 unique  
51 nanobodies (Nbs), originated from an immunized alpaca which bind with high affinities to the  
52 glycosylated SARS-CoV-2 Spike receptor domain (RBD). Using a multiplex *in vitro* binding  
53 assay we showed that eight of the selected Nbs effectively block the interaction between RBD,  
54 S1-domain and homotrimeric Spike protein with the angiotensin converting enzyme 2 (ACE2)  
55 as the viral docking site on human cells. According to competitive binding analysis and detailed  
56 epitope mapping, we grouped all Nbs blocking the RBD:ACE2 interaction in three distinct Nb-  
57 Sets and demonstrated their neutralizing effect with  $IC_{50}$  values in the low nanomolar range in  
58 a cell-based SARS-CoV-2 neutralization assay. Tested Nb combinations from different sets  
59 showed substantially lower  $IC_{50}$  values in both functional assays indicating a profound  
60 synergistic effect of Nbs simultaneously targeting different epitopes within the RBD. Finally,  
61 we applied the most potent Nb combinations in a competitive multiplex binding assay which  
62 we termed NeutrobodyPlex and detected a neutralizing immune response in plasma samples  
63 of infected individuals. We envisage that our Nbs have a high potential for prophylactic as well  
64 as therapeutic options and provide a novel approach to screen for a neutralizing immune  
65 response in infected or vaccinated individuals thus helping to monitor the immune status or to  
66 guide vaccine design.

67

## 68 **Introduction**

69 The pandemic of Corona Virus Disease 2019 (COVID-19) has been a tremendous wakeup call  
70 as we are currently faced with a highly contagious virus that per mid-September 2020 has  
71 caused the death of more than 900,000 people world-wide. Facing the current lack of cure or  
72 approved vaccine most countries suffer from severe lockdowns and dramatic economic losses.  
73 Neutralizing antibodies targeting the causative agent of the disease, the severe acute  
74 respiratory syndrome coronavirus 2 (SARS-CoV-2), gain substantial interest for prophylactic  
75 and therapeutic options and could help guide vaccine design [1]. These antibodies prevent  
76 cellular entry by binding to the docking site of the virus. The SARS-CoV-2 virus binds to the  
77 angiotensin converting enzyme II (ACE2) present on human lung epithelium via its receptor  
78 binding domain (RBD) located within the homotrimeric transmembrane Spike glycoprotein  
79 (Spike) forming a "large-area" interaction site [2]. Since the outbreak of the COVID-19  
80 pandemic, a constantly growing number of neutralizing antibodies targeting the RBD of SARS-  
81 CoV-2 has been identified from COVID-19 patients [1, 3] underlining the importance of RBD-  
82 specific antibodies blocking the RBD:ACE2 interaction site for the development of a protective  
83 immune response [4]. A promising alternative to conventional antibodies (IgGs) are single-  
84 domain antibodies (nanobodies, Nbs) derived from the heavy-chain antibodies of camelids  
85 (**Figure 1**). Due to their small size and compact folding Nbs show a high chemical stability,  
86 solubility and fast tissue penetration. Employing a targeted screening approach Nbs can be  
87 selected against different epitopes on the same antigen and easily converted into multivalent  
88 formats [5]. In comparison to antibodies Nbs have similar specificities and affinities and, due  
89 to their high homology with human antibody (VH) fragments they show only very low  
90 immunogenicity. With VHH-72 the first cross-reactive Nb which binds the RBD of SARS-CoV-  
91 1 as well as of SARS-CoV-2 was recently reported [6]. Since this first publication, several  
92 SARS-CoV-2 RBD specific Nbs were identified from naïve/ synthetic libraries [7-9] or  
93 immunized animals [10-14]. However, to date only very few Nbs were identified displaying high  
94 affinities in the monovalent format [8, 10]. Most of them have to be converted into multivalent  
95 formats or applied as Fc fusion to efficiently block virus entry [6, 7]. This limits the developability

96 and applicability of those binders since protein size is distinctly increased and furthermore Fc  
97 fusions bear the risk of unwanted antibody-dependent enhancement (ADE) in patients.  
98 Additionally, the observed high mutation rate of SARS-CoV-2 [15, 16] further stresses the need  
99 of selecting high affinity Nbs addressing multiple epitopes within the RBD to ensure sufficient  
100 neutralization potency of virus harboring sequential and/ or structural changes in their docking  
101 site.

102 Here we describe the selection of 11 unique Nbs, from a Nb gene library derived from an  
103 alpaca immunized with glycosylated SARS-CoV-2 RBD. All Nbs can be readily produced in  
104 bacteria at high yields and bind their target structure with strong affinities in their monovalent  
105 format. Eight of the selected Nbs effectively block the interaction between RBD, S1-domain  
106 and the homotrimeric Spike protein with ACE2 as the viral docking site in a multiplex *in vitro*  
107 binding assay. Based on competitive binding analysis and detailed epitope mapping using  
108 Hydrogen Deuterium Exchange mass spectrometry (HDX-MS) we clustered all ACE2 blocking  
109 Nbs in three distinct Nb-Sets and demonstrated their potential to neutralize SARS-CoV-2  
110 infection in a human cell model. By testing combinations from different Nb-Sets in both  
111 functional assays, we achieved substantially improved IC<sub>50</sub> values indicating a highly  
112 synergistic effect of Nbs targeting simultaneously different epitopes within the RBD. Finally,  
113 we performed a competitive binding assay, which we termed NeurobodyPlex, using serum  
114 samples from infected individuals and the most potent inhibitory Nb combinations. With this  
115 approach we demonstrated the presence of antibodies in patient samples addressing the  
116 RBD:ACE2 interface which are in accordance to previous findings designed as being  
117 neutralizing antibodies. Based on the data presented here, we propose, that our Nbs have a  
118 high potential for prophylactic and therapeutic options and provide a novel high-throughput  
119 approach to screen for a neutralizing immune response in infected or vaccinated individuals  
120 thus helping to monitor the immune status or to guide vaccine design.

121

## 122 **Results**

### 123 *Selection of Nbs binding to the RBD of SARS-CoV-2*

124 To generate Nbs directed against the RBD of SARS-CoV-2 we expressed and purified RBD in  
125 mammalian (Expi293) cells [17] and immunized an alpaca (*Vicugna pacos*) following a 64-day  
126 immunization protocol. Subsequently, we generated a Nb phagemid library comprising ~ 4 x  
127 10<sup>7</sup> clones representing the full repertoire of the variable heavy chains of heavy-chain  
128 antibodies (V<sub>H</sub>Hs or Nbs) derived from the animal. The library was subjected to phage display  
129 and biopanning was performed using either passively adsorbed or biotinylated RBD  
130 immobilized on streptavidin plates. After two phage display cycles we analyzed 492 individual  
131 clones in a solid-phase phage ELISA and identified 325 positive binders. Sequence analysis  
132 of 72 clones revealed 11 unique Nbs which cluster in eight families with highly diverse  
133 complementarity determining regions (CDR) 3 (**Figure 2 A**). Individual Nbs were cloned with  
134 a C-terminal His<sub>6</sub>-tag, expressed in *Escherichia coli* (*E.coli*) and purified using immobilized  
135 metal ion affinity chromatography (IMAC) followed by size exclusion chromatography (SEC)  
136 (**Figure 2 B**). For affinity measurements, we used biolayer interferometry (BLI) and  
137 immobilized biotinylated RBD on the sensor tip. Incubation with serial dilutions of the Nbs  
138 revealed K<sub>D</sub> values ranging from ~1.3 nM to ~53 nM indicating a strong binding of the Nbs in  
139 their monovalent format. NM1225 revealed a binding affinity in the micromolar range and was  
140 therefore not considered for further analysis. (**Figure 2 C, Supplementary Figure 1**).

141

### 142 *Nbs compete with ACE2 for binding to RBD, S1 or homotrimeric Spike*

143 Next we analyzed the potential of the Nbs to block the interaction between homotrimeric Spike,  
144 S1 domain or the RBD to ACE2. We utilized an in-house developed multiplex binding assay  
145 for which we first covalently coupled the respective SARS-CoV-2 derived proteins on spectrally  
146 distinct populations of paramagnetic beads (MagPlex Microspheres) [18]. For parallelized  
147 analysis these beads were pooled and simultaneously incubated with biotinylated ACE2 and  
148 dilutions of purified Nbs ranging from 2 μM to 12.3 pM. To screen for inhibitory Nbs, residual  
149 binding of ACE2 to distinct viral antigens was detected on a Luminex instrument using R-

150 phycoerythrin (PE)-labeled streptavidin after stringent washing. Additionally, as negative  
151 control a non-specific Nb (GFP-Nb) and as positive control two inhibiting mouse antibodies  
152 were analyzed [19]. Data obtained by this multiplex binding assay showed that eight of the 10  
153 analyzed Nbs inhibit ACE2 binding to isolated RBD, S1 domain and homotrimeric Spike. IC<sub>50</sub>  
154 values calculated for inhibition of ACE2:RBD interaction ranges between 0.5 nM for NM1228  
155 and 38 nM for NM1229 (**Figure 3**). Notably, IC<sub>50</sub> values obtained for the most potent inhibitory  
156 Nbs NM1228 (0.5 nM), NM1226 (0.85 nM) and NM1230 (2.12 nM) are highly comparable to  
157 IC<sub>50</sub> values measured for the mouse IgGs (40591-MM43: 0.38 nM; 40592-MM57: 3.22 nM).  
158 Additionally, the assay revealed that all Nbs except NM1224, show a similarly strong inhibitory  
159 effect of ACE2 binding to all tested antigens. NM1224 seems to exclusively inhibit RBD:ACE2  
160 interaction and does not prevent binding of ACE2 to neither homotrimeric Spike nor S1 domain.  
161

#### 162 *Epitope binning*

163 After identifying RBD-specific Nbs with inhibitory effect on ACE2 binding, we investigated the  
164 relative location of their epitopes within the RBD. Thus, we first performed epitope binning  
165 experiments of Nb combinations using BLI. After coating sensors with biotinylated RBD, a first  
166 Nb was loaded until binding saturation was reached, followed by a short dissociation step to  
167 remove excess Nb. A second Nb from a different family was then exposed to the RBD-Nb-  
168 complex. Using this approach, we identified Nbs which recognize overlapping and non-  
169 overlapping epitopes on RBD (**Figure 4, Supplementary Figure 2**). As expected Nbs with  
170 only minor differences in their CDR3 (NM1221, NM1222 and NM1230, Nb-Set 2) were  
171 suggested to recognize an identical or highly similar epitope as they cannot bind  
172 simultaneously to RBD. Interestingly, our analysis revealed that Nbs with highly diverse CDR3s  
173 such as NM1228, NM1226, NM1227 and NM1229 also could not bind simultaneously,  
174 suggesting that these Nbs recognize similar or at least overlapping epitopes. Accordingly, we  
175 clustered these diverse Nbs in Nb-Set 1. In total, based on epitope binning, we identified five  
176 distinct Nbs-Sets, comprising at least one candidate targeting a different epitope within the  
177 RBD compared to any member of a different Nb-Set (**Figure 4**).

178

179 *Epitope mapping of RBD binding Nbs*

180 We next performed Hydrogen-Deuterium Exchange Mass Spectrometry (HDX-MS) with the  
181 most potent inhibitory Nbs selected from the different Nb-Sets to more precisely locate their  
182 binding sites at the surface of RBD, and allowing comparison with the RBD:ACE2 interface.  
183 Both members of Nb-Set1, NM1226 and NM1228, interacted with the RBD at the back/ lower  
184 right site (Back View, **Figure 5**). Notably, the binding site of NM1226 does not encompass  
185 amino acid residues involved in the RBD:ACE2 interface. In contrast, NM1228 (Nb-Set1) as  
186 well as NM1230 (Nb-Set2) contacted RBD at amino acid residues overlapping with the  
187 RBD:ACE2 binding interface, whereas NM1230 additionally covers parts of the spike-like loop  
188 region on one edge of the ACE2 interface at the top front/ lower left side (Front View, **Figure**  
189 **5**). In accordance to our binning studies, Nbs from both Sets do not share overlapping epitopes.  
190 As expected, NM1221 and NM1222 (both Nb-Set2) addressed similar RBD regions compared  
191 to NM1230 (**Supplementary Figure 3**). NM1224 (Nb-Set4) showed an interaction distinct from  
192 all other Nbs covering besides its main binding region located at the lower right side (Front  
193 View, **Figure 5**) also residues in the ACE2:RBD interface (upper left corner, Front View, **Figure**  
194 **5**). As negative control, we analyzed the non-inhibitory NM1223 (Nb-Set3) (**Figure 5**) which  
195 did not contact any amino acid residues involved in the RBD:ACE2 interface but rather binds  
196 to the opposite site (Front View, **Figure 5**). Comparing the data from epitope binning with the  
197 HDX-MS results provides structural insights into the mechanism by which non-competing pairs  
198 of Nbs can simultaneously bind the RBD. Interestingly, the combination of NM1228 (Nb-Set1)  
199 with NM1230 (Nb-Set2) shows a nearly complete coverage of the ACE2 interface (**Figure 5**)  
200 whereas the observed inhibitory effect of NM1226 might be due to steric hindrance. In  
201 conclusion, we suppose that the combination of Nb-Set1 with Nb-Set2 acts synergistically on  
202 the inhibition of the interaction between RBD and ACE2.

203

204 *RBD Nbs can potently neutralize the SARS-CoV-2 virus*



205 After identification of Nbs which inhibit the RBD:ACE2 interaction biochemically, we employed  
206 a cell-based viral infection assay to test for their neutralization potency. Thus, human Caco-2  
207 cells were co-incubated with the icSARS-CoV-2-mNG strain and serial dilutions of the  
208 inhibitory Nbs NM1224, NM1226, NM1228 and NM1230. 48 h post-infection neutralization  
209 potency was determined via automated fluorescence-microscopy of fixed and nuclear-stained  
210 cells. As read-out cell count and infection rate were analyzed from cell images.  
211 **(Supplementary Figure 4)**. Percentage of infected cells following Nb treatment normalized to  
212 a non-treated control was plotted and  $IC_{50}$  values were determined via sigmoidal inhibition  
213 curve fits as the half-maximal infection. Overall, data obtained from the multiplex binding assay  
214 and the viral infection assay revealed a broad consistency. Representatives of Nb-Set1,  
215 NM1226 and NM1228, showed the highest neutralization potency with  $IC_{50}$  values of ~15 nM  
216 and ~7 nM followed by NM1230 (~37 nM) and NM1224 (~256 nM). As expected, NM1223 (Nb-  
217 Set3) was not found to reduce viral infectivity.

218 Considering that Nbs targeting diverse epitopes within the RBD:ACE2 interface are beneficial  
219 to pronouncedly reduce viral infectivity and prevent mutational escape, we next combined the  
220 most potent inhibitory and neutralizing candidates derived from Nb-Set1 (NM1226, NM1228)  
221 and Nb-Set2 (NM1230) and tested them in the multiplex binding assay and for viral  
222 neutralization. In the multiplex binding assay the combination of NM1226 and NM1230 showed  
223 an increased effect in competing with ACE2 binding to RBD illustrated by a  $IC_{50}$  of 0.42 nM  
224 which is 2- or 5-fold lower compared to treatment with individual NM1226 or NM1230,  
225 respectively **(Figure 7 A)**. Notably, the  $IC_{50}$  measured for the combination of NM1228 and  
226 NM1230 did not exceed the  $IC_{50}$  identified for NM1228 alone indicating that NM1228 by its own  
227 has a very high inhibiting effect **(Figure 7 A)**. When we tested both combinations in the viral  
228 infection assay, we observed significantly improved effects for both of them illustrated by an  
229  $IC_{50}$  of ~4 nM for the combination NM1226 and NM1230 and ~3.5 nM for NM1228 and NM1230  
230 **(Figure 7 B, Supplementary Figure 5)**. From these findings we conclude, that a combinatorial  
231 treatment with two Nbs targeting different epitopes within the RBD:ACE2 interaction site is  
232 highly beneficial for viral neutralization.

233

234 *The NeurobodyPlex - High-throughput detection of neutralizing antibodies in serum samples*  
235 *of patients after SARS-CoV-2 infection*

236 Recently, several serological assays analyzing the immune response in infected and  
237 recovered SARS-CoV-2 patients have been published [17, 18, 20-22]. These assays provide  
238 data on the presence and distribution of antibody subtypes against the SARS-CoV-2 within  
239 serum samples. However, while those testing systems detect the overall antibody response  
240 against distinct antigens of SARS-CoV-2, they do not provide the answer to the most relevant  
241 question whether the tested individuals carry neutralizing antibodies which prevent reinfection.  
242 In this context, multiple studies have convincingly shown that neutralizing antibodies preferable  
243 bind to the RBD domain and sterically inhibit viral entry via ACE2 [1, 3]. This let us assume  
244 that our RBD Nbs covering large parts of the RBD:ACE2 interface might be suitable to monitor  
245 the emergence and presence of neutralizing antibodies in patients. To test this hypothesis, we  
246 set up a high-throughput competitive binding assay, termed NeurobodyPlex, by combining our  
247 most potent neutralizing Nb combinations with a recently developed, automatable multiplex  
248 immunoassay (**Figure 8 A**) [18]. We incubated our previously generated color-coded beads  
249 comprising RBD, S1 domain or homotrimeric Spike with serum samples from patients or non-  
250 infected individuals in addition to dilution series of the combinations NM1226/ NM1230 or  
251 NM1228/ NM1230 followed by the detection of patient-derived IgGs bound to the respective  
252 antigens. Depending on the Nb concentration, neutralizing antibodies targeting the RBD:ACE2  
253 interaction site within the serum samples are displaced resulting in a reduction of the  
254 detectable signal (**Figure 8 A**).

255 By analyzing RBD specific IgGs from serum samples, we detected a distinct signal reduction  
256 in the presence of increasing Nb concentrations for all tested samples (**Figure 8 B**,  
257 **Supplementary Figure 6 A**) indicating that all patients comprise a substantial fraction of RBD-  
258 reactive IgGs targeting the RBD:ACE2 interface. Notably, we observed no changes when  
259 analyzing competitive binding for IgGs addressing the homotrimeric Spike protein, which

260 suggests the presence of multiple IgGs targeting epitopes beyond the RBD:ACE2 interaction  
261 site (**Figure 8 B, Supplementary Figure 6 A**).

262 To further demonstrate that our approach is able to determine the presence of IgGs targeting  
263 the RBD:ACE2 interaction site in detailed resolution, we highlighted the effect of competing  
264 Nbs on two selected serum samples. For sample #289 we observed a clear displacement of  
265 IgGs when we measured antibody binding to RBD and S1 domain upon addition of competing  
266 Nbs, while for sample #265 only a slight reduction of the IgG signal on S1 domain was  
267 detectable (**Figure 8 C, Supplementary Figure 6 B**). Additionally, we compared our  
268 NeurobodyPlex approach using RBD-specific Nbs with conventional antibodies by applying  
269 the neutralizing mouse antibody MM43 [19] in a similar setting. Here we detected substantial  
270 cross-reactive signals from the labeled anti-human-IgG in all five serum samples  
271 (**Supplementary Figure 6 C**). From those findings we conclude, that mouse antibodies are  
272 not suitable, as they bear the risk to be falsely detected. In summary, our data revealed that  
273 the NeurobodyPlex provides a suitable screening system to monitor the presence of RBD-  
274 targeting antibodies in patient samples which can be reliably considered to mediate a  
275 neutralizing and protective immune response.

276

277 Finally, we validated our NeurobodyPlex by analyzing a cohort of 18 serum samples of  
278 convalescent SARS-CoV-2 patients and four control samples from healthy donors using one  
279 consistent Nb concentration (1.26  $\mu$ M). Within the tested serum cohort all donors infected with  
280 SARS-CoV-2 showed the presence of neutralizing antibodies, most clearly visible when using  
281 RBD as antigen (**Figure 9 A, Supplementary Figure 7**). For direct comparison with the a cell-  
282 based viral infection assay as the gold standard for detecting neutralizing serum antibodies  
283 [23], we tested the same sample cohort in dilution series using the previously described  
284 icSARS-CoV-2-mNG strain in Caco-2 cells (**Figure 9 B**). The viral infection assay revealed the  
285 presence of neutralizing antibodies in the same sample set derived from convalescent SARS-  
286 CoV-2 patients, whereas none of the samples from healthy donors showed any effect.  
287 Observable differences between the patient samples can be explained by different antibody

288 titers, which were not investigated further. In summary, our findings showed that both  
289 screening assays provide consistent information and demonstrate the suitability of our  
290 NeutrobodyPlex using RBD as the most relevant antigen to reliably monitor the presence of  
291 neutralizing antibodies in patients.

292

## 293 Discussion

294 Indisputably, there is a strong need for diagnostic tools and therapeutics against SARS-CoV-  
295 2 infection. As demonstrated for neutralizing antibodies selected from convalescent COVID-  
296 19 patients, biologically-derived binding molecules can effectively address the large interaction  
297 site of the RBD domain of SARS-CoV-2 and the ACE2 receptor exposed on human lung  
298 epithelium [3, 24, 25]. A promising alternative to conventional antibodies are Nbs derived either  
299 from naïve/ synthetic libraries or immunized camelids [26]. By employing suitable screening  
300 strategies, Nbs addressing predefined domains within larger antigens can be selected. Since  
301 the description of the first Nb shown to bind the RBD of homotrimeric Spike protein of SARS-  
302 CoV-2 [6], multiple well working Nbs targeting this particular viral domain have been identified  
303 [7, 8, 10, 11]. In this study we identified 11 novel RBD-specific Nbs derived from an immunized  
304 animal (*Vicugna pacos*). According to their sequences these Nbs can be clustered in 8 unique  
305 families representing different germ lines which indicates a prominent immune response  
306 towards the fully glycosylated antigen. All identified monovalent Nbs except NM1225 showed  
307 affinities in the low nanomolar range. Thus, these Nbs do not require reformatting into bivalent  
308 formats e.g. by fusing to a Fc domain or by combining multiple binding sites as previously  
309 shown for other RBD targeting Nbs [6, 9, 10, 12-14].

310 For functional analysis we employed a recently developed *in vitro* multiplex binding assay [18]  
311 to monitor the replacement of ACE2 as the natural ligand from binding to RBD, S1 domain or  
312 homotrimeric Spike upon addition of RBD-specific Nbs. With this assay we were able to identify  
313 eight inhibiting Nbs targeting those Spike-derived antigens. Interestingly,  $IC_{50}$  values obtained  
314 for inhibitory Nbs on RBD and homotrimeric Spike show a higher correlation compared to  $IC_{50}$   
315 values obtained for the S1 domain. Based on a detailed epitope mapping, we grouped our Nbs  
316 in five different Nb-Sets. Three of those Nb-Sets are comprising inhibitory Nbs, which were  
317 shown to target different epitopes within the RBD:ACE2 interaction site. We confirmed the  
318 neutralizing potency of those Nbs in a cell-based viral infection assay using fully intact SARS-  
319 CoV-2. By this we noted that the measurable viral neutralization effect of the individual Nbs  
320 strongly correlates to the data obtained from the biochemical screen, which demonstrates that

321 the multiplex binding assay as presented is highly relevant and suitable to identify virus  
322 neutralizing binders. Based on these findings we modified our previously described multiplex  
323 immunoassay (MULTICOV-AB, [18]) and developed a novel diagnostic test called  
324 NeutrobodyPlex to monitor the presence and the emergence of neutralizing antibodies in  
325 serum samples of SARS-CoV-2 infected individuals. Using combinations of high affinity Nbs  
326 covering the RBD:ACE2 interface we were able to directly and specifically displace IgGs  
327 present in serum samples from these particular RBD epitopes. According to previous studies  
328 human IgGs addressing those epitopes were classified as neutralizing antibodies [1, 24, 25].  
329 In our NeutrobodyPlex we further demonstrated that such neutralizing antibodies can be  
330 detected best using the RBD. Larger Spike-derived antigens especially the full length  
331 homotrimeric Spike, which is bound by a multitude of different IgGs, could be useful to  
332 determine the fraction of neutralizing antibodies in a patient sample. Finally, we validated the  
333 suitability of our approach by testing serum samples from 18 patients and four healthy donors  
334 in comparison to the classical cell-based viral infection assay. The observed strong  
335 accordance between both assays confirmed the ability of the NeutrobodyPlex to precisely  
336 monitor the presence of neutralizing antibodies within patient samples.

337 To our knowledge, the NeutrobodyPlex employing Nbs blocking the RBD:ACE2 interaction site  
338 shows for the first time an antigen-resolved analysis of the presence of human IgGs in  
339 convalescent individuals suffering from SARS-CoV-2 infection. Compared to other neutralizing  
340 serum antibody detection tests, this assay enables the analysis on an automatable high-  
341 throughput basis and is performed with non-living and non-infectious viral material thus  
342 reducing costs and safety conditions [23, 27]. Furthermore, the NeutrobodyPlex is highly  
343 sensitive as low serum dilutions (tested dilution: 1:400) are sufficient for analysis which  
344 significantly reduces patient material compared to standard assays. Considering our findings,  
345 it is highly conceivable that the NeutrobodyPlex will open unique possibilities for a detailed  
346 classification of the individual immune status with regard to the development of protective  
347 antibodies and to monitor the efficiency of strongly needed vaccination campaigns.

348

349 **Materials and Methods**

350 **Expression constructs** For bacterial expression of Nbs, sequences were cloned into the  
351 pHEN6 vector [28], thereby adding a C-terminal 6xHis-tag for IMAC purification as described  
352 previously [29, 30]. The pCAGGS plasmids encoding the stabilized homotrimeric Spike protein  
353 and the receptor binding domain (RBD) of SARS-CoV-2 were kindly provided by F. Krammer  
354 [17]. The cDNA encoding the S1 domain (aa 1 - 681) of the SARS-CoV-2 Spike protein was  
355 obtained by PCR amplification using the forward primer S1\_CoV2-for 5' - CTT CTG GCG TGT  
356 GAC CGG - 3' and reverse primer S1\_CoV2-rev 5' - GTT GCG GCC GCT TAG TGG TGG  
357 TGG TGG TGG TGG GGG CTG TTT GTC TGT GTC TG - 3' and the full length SARS-CoV-  
358 2 Spike cDNA as template and cloned into the XbaI/ NotI-digested backbone of the pCAGGS  
359 vector, thereby adding a C-terminal His<sub>6</sub>-Tag. All expression constructs were verified by  
360 sequence analysis.

361

362 **V<sub>H</sub>H libraries** Alpaca immunizations with purified RBD and V<sub>H</sub>H-library construction were  
363 carried out as described previously [31]. Animal immunization has been approved by the  
364 government of Upper Bavaria (Permit number: 55.2-1-54-2532.0-80-14). In brief, nine weeks  
365 after immunization of an animal (*Vicugna pacos*) with either C-terminal histidine-tagged RBD  
366 (RBD-His<sub>6</sub>), ~100 ml blood were collected and lymphocytes were isolated by Ficoll gradient  
367 centrifugation using the Lymphocyte Separation Medium (PAA Laboratories GmbH). Total  
368 RNA was extracted using TRIzol (Life Technologies) and mRNA was reverse transcribed to  
369 cDNA using a First-Strand cDNA Synthesis Kit (GE Healthcare). The V<sub>H</sub>H repertoire was  
370 isolated in 3 subsequent PCR reactions using following primer combinations (1) CALL001 (5'-  
371 GTC CTG GCT GCT CTT CTA CA A GG-3') and CALL002 (5'-GGT ACG TGC TGT TGA ACT  
372 GTT CC-3') (2) forward primer set FR1-1, FR1-2, FR1-3, FR1-4 (5'-CAT GGC NSA NGT GCA  
373 GCT GGT GGA NTC NGG NGG-3', 5'-CAT GGC NSA NGT GCA GCT GCA GGA NTC NGG  
374 NGG-3', 5'-CAT GGC NSA NGT GCA GCT GGT GGA NAG YGG NGG-3', 5'-CAT GGC NSA  
375 NGT GCA GCT GCA GGA NAG YGG NGG-3') and reverse primer CALL002 and (3) forward  
376 primer FR1-ext1 and FR1-ext2 (5'-GTA GGC CCA GCC GGC CAT GGC NSA NGT GCA GCT

377 GGT GG-3', 5'-GTA GGC CCA GCC GGC CAT GGC NSA NGT GCA GCT GCA GGA-3' A-)  
378 and reverse primer set FR4-1, FR4-2, FR4-3, FR4-4, FR4-5 and FR4-6 (5'-GAT GCG GCC  
379 GCN GAN GAN ACG GTG ACC NGN RYN CC-3'. 5'-GAT GCG GCC GCN GAN GAN ACG  
380 GTG ACC NGN GAN CC-3'. 5'-GAT GCG GCC GCN GAN GAN ACG GTG ACC NGR CTN  
381 CC-3'. 5'-GAT GCG GCC GCR CTN GAN ACG GTG ACC NGN RYN CC-3'. 5'-GAT GCG  
382 GCC GCR CTN GAN ACG GTG ACC NGN GAN CC-3'. 5'-GAT GCG GCC GCR CTN GAN  
383 ACG GTG ACC NGR CTN CC-3') introducing SfiI and NotI restriction sites. The V<sub>H</sub>H library  
384 was subcloned into the SfiI/ NotI sites of the pHEN4 phagemid vector [28]

385

386 **V<sub>H</sub>H Screening** For the selection of RBD-specific V<sub>H</sub>Hs two consecutive phage enrichment  
387 rounds were performed. Therefore, TG1 cells containing the 'immune'-library in pHen4 were  
388 infected with the M13K07 helper phage, hence the V<sub>H</sub>H domains were presented superficial  
389 on phages. For each round 1 x 10<sup>11</sup> phages of the 'immune'-library were applied on RBD either  
390 directly coated on immunotubes (10 µg/ml) or biotinylated RBD (5 µg/ml) immobilized on 96-  
391 well plates pre-coated with Streptavidin. In each selection round extensive blocking of antigen  
392 and phages was performed by using 5% milk or BSA in PBS-T and with increasing panning  
393 round PBS-T washing stringency was intensified. Bound phages were eluted in 100 mM tri-  
394 ethylamind, TEA (pH 10.0), followed by immediate neutralization with 1 M Tris/HCl (pH 7.4).  
395 For phage preparation for following rounds, exponentially growing TG1 cells were infected and  
396 spread on selection plates. Antigen-specific enrichment for each round was monitored by  
397 comparing colony number of antigen vs. no antigen selection. Following panning 492 individual  
398 clones of the second selection round were screened by standard Phage-ELISA procedures  
399 using a horseradish peroxidase-labeled anti-M13 monoclonal antibody (GE-Healthcare).

400

401 **Protein expression and purification** RBD-specific Nbs were expressed and purified as  
402 previously published [29, 30]. For the expression of SARS-CoV-2 proteins (RBD, stabilized  
403 homotrimeric Spike and S1 domain) Expi293 cells were applied in agreement to the protocol  
404 of Stadlbauer *et al.* [32]. For quality control all purified proteins were analyzed via SDS-PAGE



405 according to standard procedures. Therefore, protein samples were denaturated (5 min, 95°C)  
406 in 2x SDS-sample buffer containing 60 mM Tris/HCl, pH 6.8; 2% (w/v) SDS; 5% (v/v)  
407 2-mercaptoethanol, 10% (v/v) glycerol, 0.02% bromphenole blue. All proteins were visualized  
408 by InstantBlue Coomassie (Expedeon) staining. For immunoblotting proteins were transferred  
409 on nitrocellulose membrane (Bio-Rad Laboratories) and detection was performed using anti-  
410 His primary antibody (Penta-His Antibody, #34660, Qiagen) followed by donkey-anti-mouse  
411 secondary antibody labeled with AlexaFluor647 (Invitrogen) using a Typhoon Trio scanner  
412 (GE-Healthcare, Freiburg, Germany; excitation 633 nm, emission filter settings 670 nm BP 30).  
413

414 **Biophysical biolayer interferometry (BLI)** For analyzing the binding affinity of purified Nbs  
415 towards RBD biolayer interferometry (BLItz, ForteBio) was performed. Therefore, biotinylated  
416 RBD was immobilized on single-use high-precision streptavidin biosensors (SAX) according to  
417 manufacturer's protocols. Depending on the affinity of the RBD-Nb interaction, an appropriate  
418 concentration range (15.6 nM-2 µM) of Nbs was used. In total for each run four different Nb  
419 concentrations were measured as well as a reference run using PBS instead of Nb in the  
420 association step. As negative control the GFP-Nb (500 nM) was applied in the binding studies.  
421 By this means, global fits were obtained using the BLItzPro software and the global dissociation  
422 constant ( $K_D$ ) was calculated. For the epitope competition analysis biotinylated RBD was  
423 immobilized on streptavidin sensor in the same fashion as for the affinity measurements. By  
424 two consecutive application steps each with association and short dissociation of two different  
425 Nbs (500nM) competition binding was performed.

426  
427 **Bead-based multiplex binding/ competition assay** Purified RBD, S1 domain and  
428 homotrimeric Spike of SARS-CoV-2 were covalently immobilized on spectrally distinct  
429 populations of carboxylated paramagnetic beads (MagPlex Microspheres, Luminex  
430 Corporation, Austin, TX) using 1-ethyl-3-(3-dimethylaminopropyl)carbodiimide (EDC)/ sulfo-N-  
431 hydroxysuccinimide (sNHS) chemistry. For immobilization, a magnetic particle processor  
432 (KingFisher 96, Thermo Scientific, Schwerte, Germany) was used. Bead stocks were vortexed

433 thoroughly and sonicated for 15 seconds. Subsequently, 83  $\mu\text{L}$  of 0.065% (v/v) Triton X-100  
434 and 1 mL of bead stock containing  $12.5 \times 10^7$  beads of one single bead population were  
435 pipetted into each well. The beads were then washed twice with 500  $\mu\text{L}$  of activation buffer  
436 (100 mM  $\text{Na}_2\text{HPO}_4$ , pH 6.2, 0.005% (v/v) Triton X-100) and activated for 20 min in 300  $\mu\text{L}$  of  
437 activation mix containing 5 mg/mL EDC and 5 mg/mL sNHS in activation buffer. Following  
438 activation, the beads were washed twice with 500  $\mu\text{L}$  of coupling buffer (500 mM MES, pH 5.0,  
439 0.005% (v/v) Triton X-100) and the proteins were added to the activated beads and incubated  
440 for 2 h at 21 °C to immobilize the antigens on the surface. Protein-coupled beads were washed  
441 twice with 800  $\mu\text{L}$  of wash buffer (1x PBS, 0.005 % (v/v) Triton X-100) and were finally  
442 resuspended in 1,000  $\mu\text{L}$  of storage buffer (1x PBS, 1 % (w/v) BSA, 0.05% (v/v) ProClin). The  
443 beads were stored at 4°C until further use. For bead-based multiplex assays, individual bead  
444 populations were combined into a bead mix.

445 For the bead-based ACE2 competition binding assay, Nbs were incubated with the bead-mix  
446 containing beads coupled with SARS-CoV-2 homotrimeric Spike, RBD and S1 proteins in the  
447 presence of biotinylated ACE2 (Sino Biological) competing for the binding of SARS-CoV-2  
448 spike-derived antigens. Single Nbs or Nb combinations were pre-diluted to a concentration of  
449 6.3  $\mu\text{mol/L}$  per Nb in assay buffer. Afterwards, a 4-fold dilution series was made over eight  
450 steps in assay buffer containing 160 ng/mL biotinylated ACE2. Subsequently, 25  $\mu\text{L}$  of every  
451 dilution was transferred to 25  $\mu\text{L}$  bead-mix in a 96-well half-area plate. The plate was incubated  
452 for 2 h at 21 °C, shaking at 750 rpm. Afterwards, the beads were washed using a microplate  
453 washer (Biotek 405TS, Biotek Instruments GmbH) to remove unbound ACE2 or Nbs. The  
454 beads were then incubated with R-phycoerythrin-labeled streptavidin to detect biotinylated  
455 ACE2 that bound to the immobilized antigen for 45 minutes at 21 °C shaking at 750 rpm.  
456 Afterwards, the beads were washed again to remove unbound PE-labeled streptavidin.  
457 Measurements were performed with a FLEXMAP 3D instrument using the xPONENT Software  
458 version 4.3 (settings: sample size: 80  $\mu\text{L}$ , 50 events, Gate: 7,500 – 15,000, Reporter Gain:  
459 Standard PMT).

460

461 **NeutrobodyPlex: Bead-based multiplex neutralizing antibody detection assay** Based on  
462 the recently described automatable multiplex immunoassay by Becker *et al.* [18], the  
463 NeutrobodyPlex was developed and similar assay conditions were applied. For the detection  
464 of neutralizing serum antibodies the bead-mix containing beads coupled with purified RBD, S1  
465 domain or homotrimeric Spike of SARS-CoV-2 was incubated with Nb combinations  
466 (concentrations ranging from 1.26  $\mu\text{M}$  to 0.08 nM for each Nb) and serum samples of  
467 convalescent SARS-CoV-2 patients and healthy donors at a 1:400 dilution. As positive control  
468 and maximal signal detection per sample, serum only was included and as negative control for  
469 Nb binding a SARS-CoV-2-unspecific GFP nanobody (1.26  $\mu\text{M}$ ) was used. For comparison of  
470 Nb performance the inhibiting mouse antibody (40591-MM43) was applied in concentrations  
471 of 0.17  $\mu\text{M}$  to 0.08 nM. Bound serum IgG were detected via anti-human-IgG-PE as previously  
472 described [18].

473

#### 474 **Hydrogen-Deuterium Exchange**

##### 475 *RBD Deuteration Kinetics and Epitope Elucidation*

476 RBD (5  $\mu\text{L}$ , 73  $\mu\text{M}$ ) was either incubated with PBS or RBD-specific Nbs (2.5  $\mu\text{L}$ , 2.5 mg/mL in  
477 PBS) at 25 °C for 10 min. Deuterium exchange of the pre-incubated nanobody-antigen  
478 complex was initiated by dilution with 67.5  $\mu\text{L}$  PBS (150 mM NaCl, pH 7.4) prepared with  $\text{D}_2\text{O}$   
479 and incubation for 5 and 50 minutes respectively at 25 °C. To ensure a minimum of 90% of  
480 complex formation, the molar ratio of antigen to Nbs was calculated according to Kochert *et al.*  
481 [33] using the affinity constants of 1.37 nM (NM1228), 3.66 nM (NM1226), 3.82 nM (NM1223),  
482 8.23 nM (NM1230) and 8.34 nM (NM1224) determined by BLI analysis. The final  $\text{D}_2\text{O}$   
483 concentration was 90%. After 5 and 50 min at 25 °C, aliquots of 15  $\mu\text{L}$  were taken and  
484 quenched by adding 15  $\mu\text{L}$  ice-cold quenching solution (0.2 M TCEP with 1.5% formic acid and  
485 4 M guanidine HCl in 100 mM ammonium formate solution pH 2.2) resulting in a final pH of  
486 2.5. Quenched samples were immediately snap frozen. The immobilized pepsin was prepared  
487 by adding 60  $\mu\text{L}$  of 50% slurry (in ammonium formate solution pH 2.5) to a tube and dried by  
488 centrifugation at 1000 x g for 3 min at 0 °C and discarding the supernatant. Before injection,

489 aliquots were thawed and added to the dried pepsin beads. Proteolysis was performed for 2  
490 min in a water ice bath followed by filtration using a 22  $\mu\text{m}$  filter and centrifugation at 1000 x g  
491 for 30 s at 0 °C. Samples were immediately injected to a LC-MS system. Undeuterated control  
492 samples were prepared under the same conditions using H<sub>2</sub>O instead of D<sub>2</sub>O. The same  
493 protocol was applied for the Nbs without addition of RBD as well to create a list of peptic  
494 peptides. The HDX experiments of the RBD-Nb-complex were performed in triplicates. The  
495 back-exchange of the method as determined using a standard peptide mixture of 14 synthetic  
496 peptides was 24%.

497

#### 498 *Chromatography and Mass Spectrometry*

499 HDX samples were analyzed on a LC-MS system comprised of RSLC pumps (UltiMate 3000  
500 RSLCnano, Thermo Fisher Scientific, Dreieich, Germany), a chilling device for  
501 chromatography (Mécour Temperature Control, Groveland, MA, USA) and a mass  
502 spectrometer Q Exactive (Thermo Fisher Scientific, Dreieich, Germany). The chilling device  
503 contained the LC column (ACQUITY BEH C18, 1.7  $\mu\text{m}$ , 300 Å, 1 mm x 50 mm (Waters GmbH,  
504 Eschborn, Germany)), a cooling loop for HPLC solvents, a sample loop, and the injection valve  
505 and kept them at 0 °C. Samples were analyzed using a two-step 20 min linear gradient with a  
506 flow rate of 50  $\mu\text{l}/\text{min}$ . Solvent A was 0.1% (v/v) formic acid and solvent B was 80% acetonitrile  
507 (v/v) with 0.1% formic acid (v/v). After 3 min desalting at 10% B, a 9 min linear gradient from  
508 10 to 25% B was applied followed by an 8 min linear gradient from 25 to 68.8%. Experiments  
509 were performed using a Q Exactive (Thermo Fisher Scientific, Dreieich, Germany) with 70,000  
510 resolutions instrument configurations as follows: sheath gas flow rate of 25; aux gas flow rate  
511 of 5; S-lens RF level of 50, spray voltage of 3.5 kV and a capillary temperature of 300 °C.

512

#### 513 *HDX Data Analysis*

514 A peptic peptide list containing peptide sequence, retention time and charge state was  
515 generated in a preliminary LC-MS/MS experiment. The peptides were identified by exact mass  
516 and their fragment ion spectrum using protein database searches by Proteome Discoverer

517 v2.1.0.81 (Thermo Fisher Scientific, Dreieich, Germany) and implemented SEQUEST HT  
518 search engine. The protein database contained the RBD and the pepsin sequences. Precursor  
519 and fragments mass tolerance were set to 6 ppm and 0.05 Da, respectively. No enzyme  
520 selectivity was applied, however identified peptides were manually evaluated to exclude  
521 peptides originated through cleavage after arginine, histidine, lysine, proline and the residue  
522 after proline [34]. FDR was estimated using q-values calculated by Percolator and only  
523 peptides with high-confidence identification (q-value  $\leq$  0.01) were included to the list. Peptides  
524 with overlapping mass, retention time and charge in Nb and antigen digest, were manually  
525 removed. The deuterated samples were recorded in MS mode only and the generated peptide  
526 list was imported into HDEaminer v2.5.0 (Sierra Analytics, Modesto, CA, USA). Deuterium  
527 uptake was calculated using the increase of the centroid mass of the deuterated peptides.  
528 HDX could be followed for 79% of the RBD amino acid sequence. The calculated percentage  
529 deuterium uptake of each peptide between RBD-Nb and RBD-only were compared. Any  
530 peptide with uptake reduction of 5% or greater upon Nb binding was considered as protected.

531

532 **Cell culture** Caco-2 (Human Colorectal adenocarcinoma) cells were cultured at 37°C with 5%  
533 CO<sub>2</sub> in DMEM containing 10% FCS, with 2 mM l-glutamine, 100 µg/ml penicillin-streptomycin  
534 and 1% NEAA.

535

536 **Viruses** All experiments associated with the authentic virus were conducted in Biosafety Level  
537 3 laboratory. The recombinant SARS-CoV-2 expressing mNeonGreen (icSARS-CoV-2-mNG)  
538 (PMID: 32289263) was obtained from the World Reference Center for Emerging Viruses and  
539 Arboviruses (WRCEVA) at the UTMB (University of Texas Medical Branch). To generate  
540 icSARS-CoV-2-mNG stocks, 200.000 Caco-2 cells were infected with 50 µl of virus in a 6-well  
541 plate, the supernatant was harvested 48 hpi, centrifuged, and stored at -80°C. For MOI  
542 determination, a titration using serial dilutions of the mNeonGreen (icSARS-CoV-2-mNG) was  
543 conducted. The number of infectious virus particles per ml was calculated as the (MOI × cell  
544 number) / (infection volume), where  $MOI = -\ln(1 - \text{infection rate})$ .

545

546 **Neutralization assay** For neutralization experiments,  $1 \times 10^4$  Caco-2 cells/well were seeded in  
547 96-well plates the day before infection in media containing 5% FCS. Caco-2 cells were co-  
548 incubated with the SARS-CoV-2 strain icSARS-CoV-2-mNG at a MOI=1.1 and Nbs or serum  
549 samples in serial dilutions in the indicated concentrations. 48 hpi cells were fixed with 2% PFA  
550 and stained with Hoechst33342 (1  $\mu\text{g}/\text{mL}$  final concentration) for 10 minutes at 37°C. The  
551 staining solution was removed and exchanged for PBS. For quantification of infection rates,  
552 images were taken with the Cytation3 (Biotek) and Hoechst+ and mNG+ cells were  
553 automatically counted by the Gen5 Software (Biotek). Data were normalized to respective  
554 virus-only infection control. Inhibitory concentration 50 ( $\text{IC}_{50}$ ) was calculated as the half-  
555 maximal inhibitory dose using 4-parameter nonlinear regression (GraphPad Prism).

556

557 **Patient samples** A total of 23 serum samples from SARS-CoV-2 convalescent donors and 4  
558 healthy donors were analyzed in the course of this study. All samples used were de-identified  
559 and pre-existing. Ethical consent was granted from the Ethics commission of the University of  
560 Tuebingen under the votum 179/2020/BO2. Samples were classified as SARS-CoV-2 infected,  
561 due to a self-reported positive SARS-CoV-2 RT-PCR.

562

563 **Analyses and Statistics** Graph preparation and statistical analysis was performed using the  
564 GraphPad Prism Software (Version 8.3.0).

565

566

567 **Data availability**

568 The data that support the findings of this study are available from the corresponding authors  
569 upon reasonable request.

570

571 **Authorship Contributions**

572 N.S.M., T.W., M.B. and U.R. designed the study; P.D.K., B.T. T.W. performed Nb selection  
573 and biochemical characterization; S.N., A.S. immunized the animals; J.H., D.J., M.B.,  
574 performed the multiplex binding assay; M.G., A.Z. performed HDX-MS experiments; Mo.S.,  
575 G.K. A.N., J.S.W. and K.S.L. organize and provide patient samples; N.R.B., M.S. performed  
576 viral neutralization assays; T.W., M.B., J.H., M.G., A.Z., N.R.B., M.S. and U.R. analyzed data  
577 and performed statistical analysis. T.W. and U.R. drafted the manuscript; N.S.M., U.R.  
578 supervised the study. All authors critically read the manuscript.

579

580

581 **Figures:**

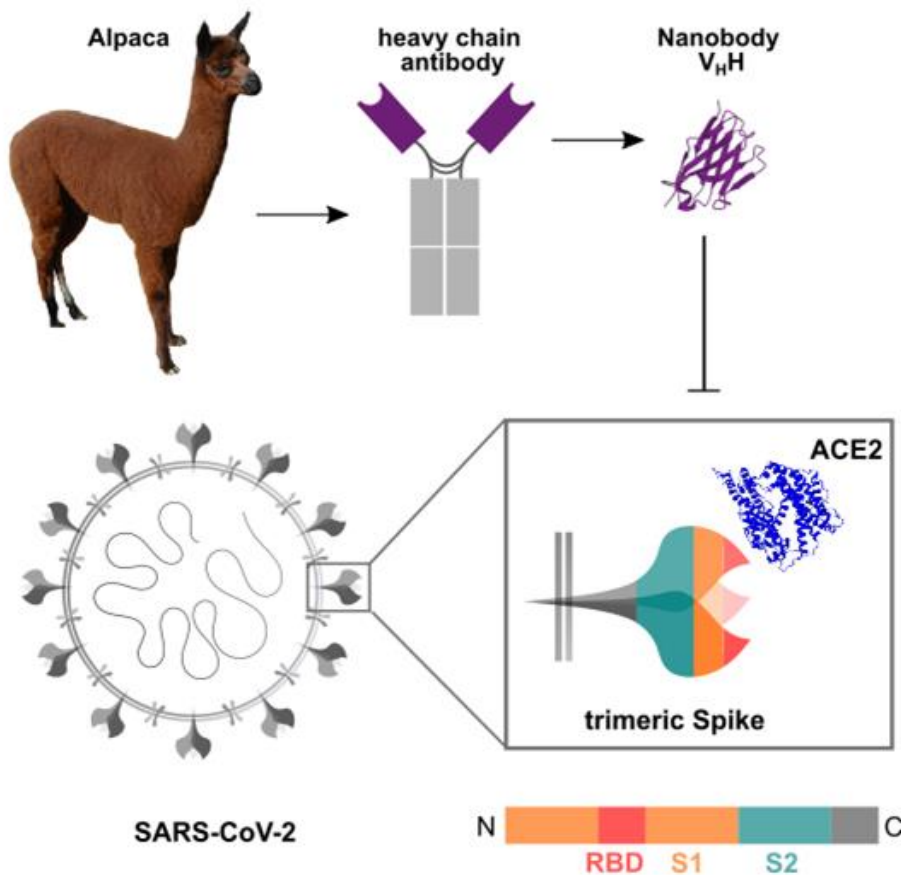

582

583 **Figure 1 Schematic depiction of the generation of Nbs blocking the SARS-CoV-2**

584 **RBD:ACE2 interaction site**

585 Nanobodies (Nbs) are genetically engineered from heavy chain only antibodies of alpacas.

586 The interaction between the SARS-CoV-2 homotrimeric Spike protein and ACE2 can be

587 blocked by RBD-specific Nbs. Protein structures adapted from PDB 3OGO (Nb) and 6CS2

588 (ACE2).

589



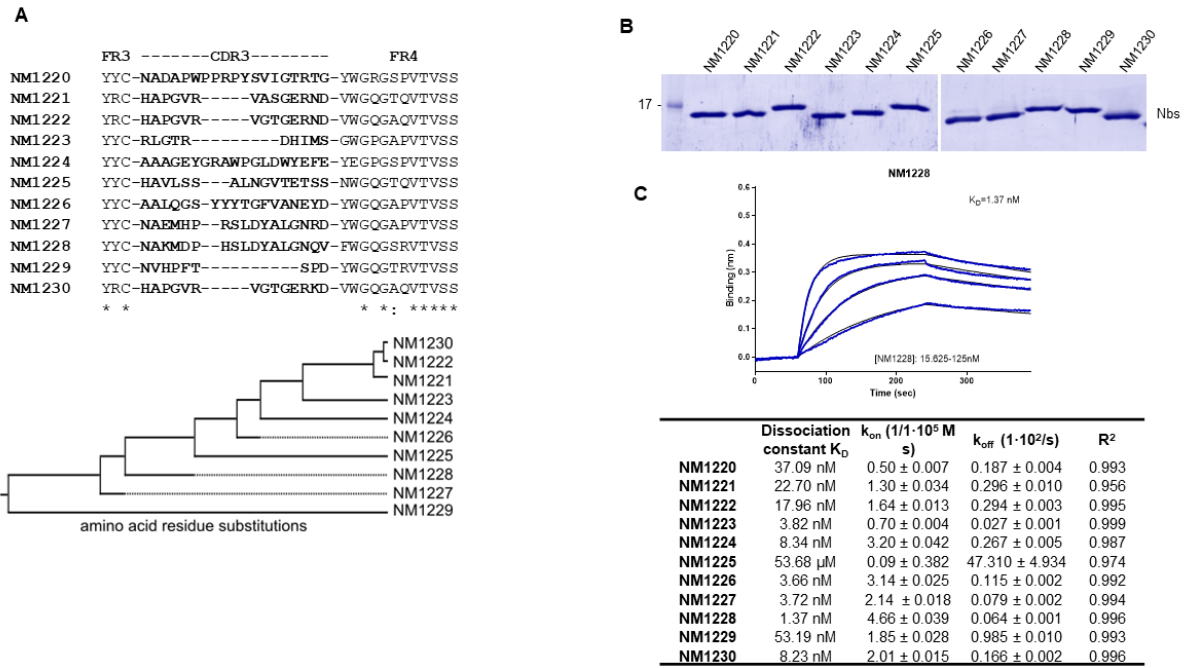

590

591 **Figure 2: Selection of nanobodies (Nbs) against RBD**

592 **(A)** Amino acid sequences of the complementarity determining region (CDR) 3 from unique  
593 Nbs selected after two rounds of biopanning are listed (upper panel). Phylogenetic tree based  
594 on a ClustalW alignment of the CDR3 sequences is shown (lower panel). **(B)** Recombinant  
595 expression and purification of Nbs using immobilized metal affinity chromatography (IMAC)  
596 and size exclusion chromatography (SEC). Coomassie staining of 2  $\mu$ g of purified Nbs is  
597 shown **(C)** For biolayer interferometry (BLI)-based affinity measurements, biotinylated RBD  
598 was immobilized on streptavidin biosensors. Kinetic measurements were performed by using  
599 four concentrations of purified Nbs ranging from 15.6 nM - 2  $\mu$ M. As an example the sensogram  
600 of NM1228 at indicated concentrations is shown (upper panel). The table summarizes affinities  
601 ( $K_D$ ), association ( $K_{on}$ ) and dissociation constants ( $K_{off}$ ) determined for individual Nbs (lower  
602 panel).

603

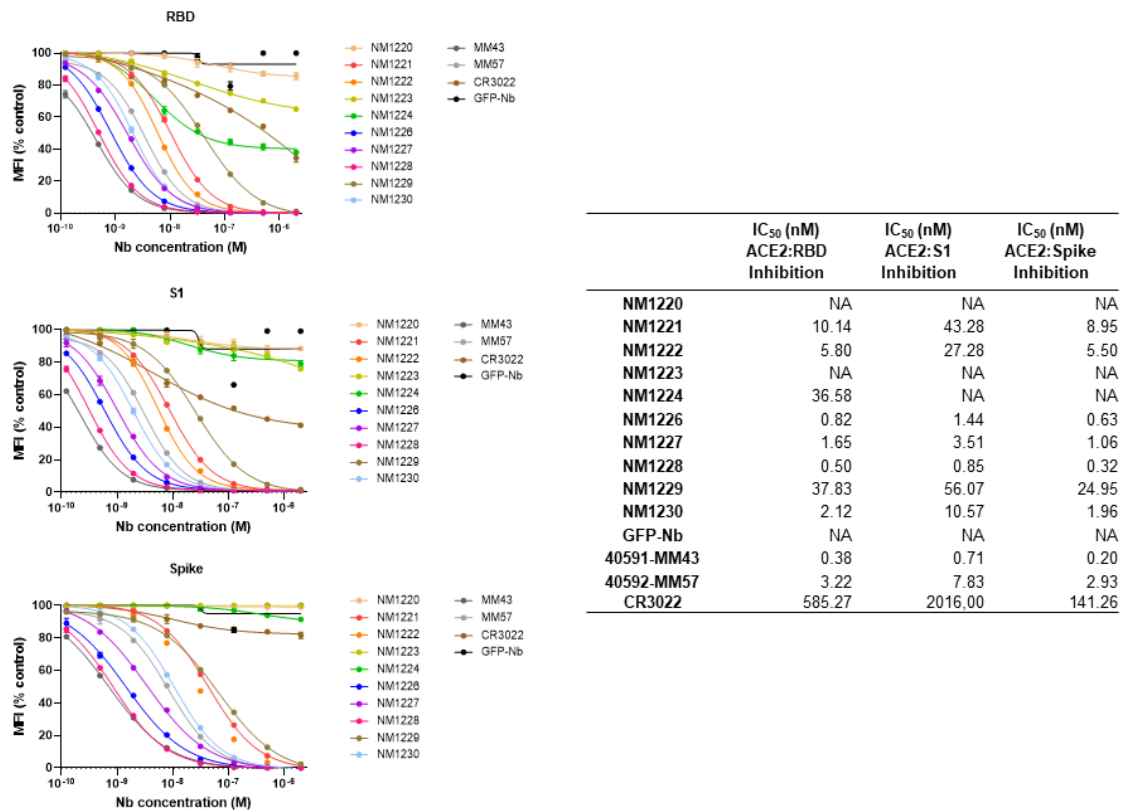

604

### 605 **Figure 3: Multiplex binding assay to identify inhibitory Nbs**

606 Results from bead-based multiplex ACE2 competition assay are shown for the three SARS-  
 607 CoV-2 Spike-derived antigens, RBD, S1 and homotrimeric Spike. ACE2 bound to the  
 608 respective antigen was detected. For each Nb, a dilution series over eight steps (2.106  $\mu$ M to  
 609 0.123 nM) is shown in the presence of 80 ng/mL ACE2. MFI signals were normalized to the  
 610 maximal signal per antigen as given by the ACE2-only control. IC<sub>50</sub> values were calculated  
 611 from a four-parametric sigmoidal model and are displayed for each Nb and antigen. Data are  
 612 presented as mean  $\pm$  stds of three technical replicates (n =3).

613

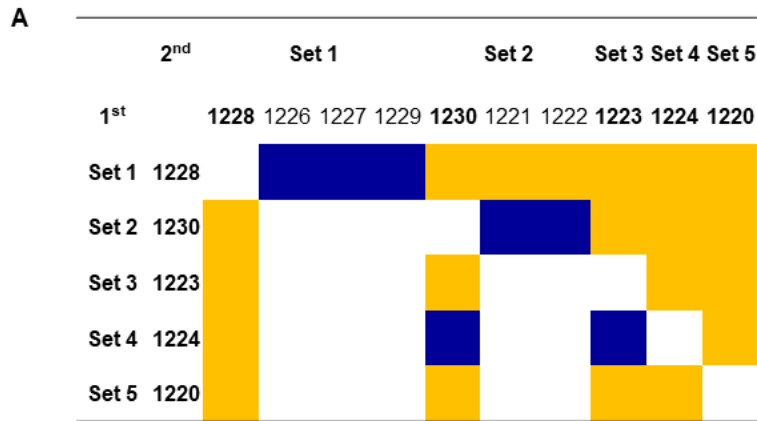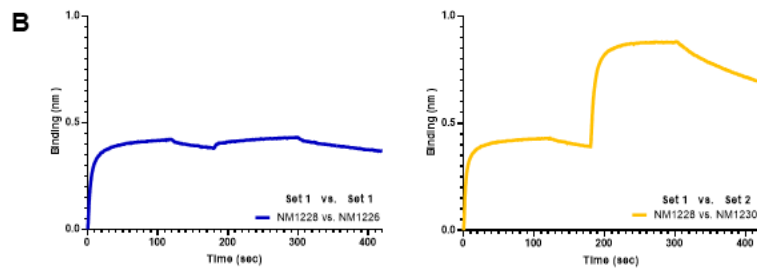

614

#### 615 **Figure 4 Epitope binning of Nbs**

616 (A) Heat map illustration of competitive Nb epitope binning on RBD using biolayer  
617 interferometry (BLI). Rows and columns represent the loading of the first and second Nb,  
618 respectively. Blue colored squares illustrate no additional binding of the second Nb meaning  
619 both Nbs belong to the same Nb-Set. Orange colored squares represent additional binding of  
620 the second Nb, hence these Nbs belong to different Nb-Sets. (B) Representative sensograms  
621 of single BLI measurements of Nbs affiliated to the same Nb-Set (NM1228/ NM1226, blue) and  
622 to different Nb-Sets (NM1228/ NM1230, orange) are shown.

623

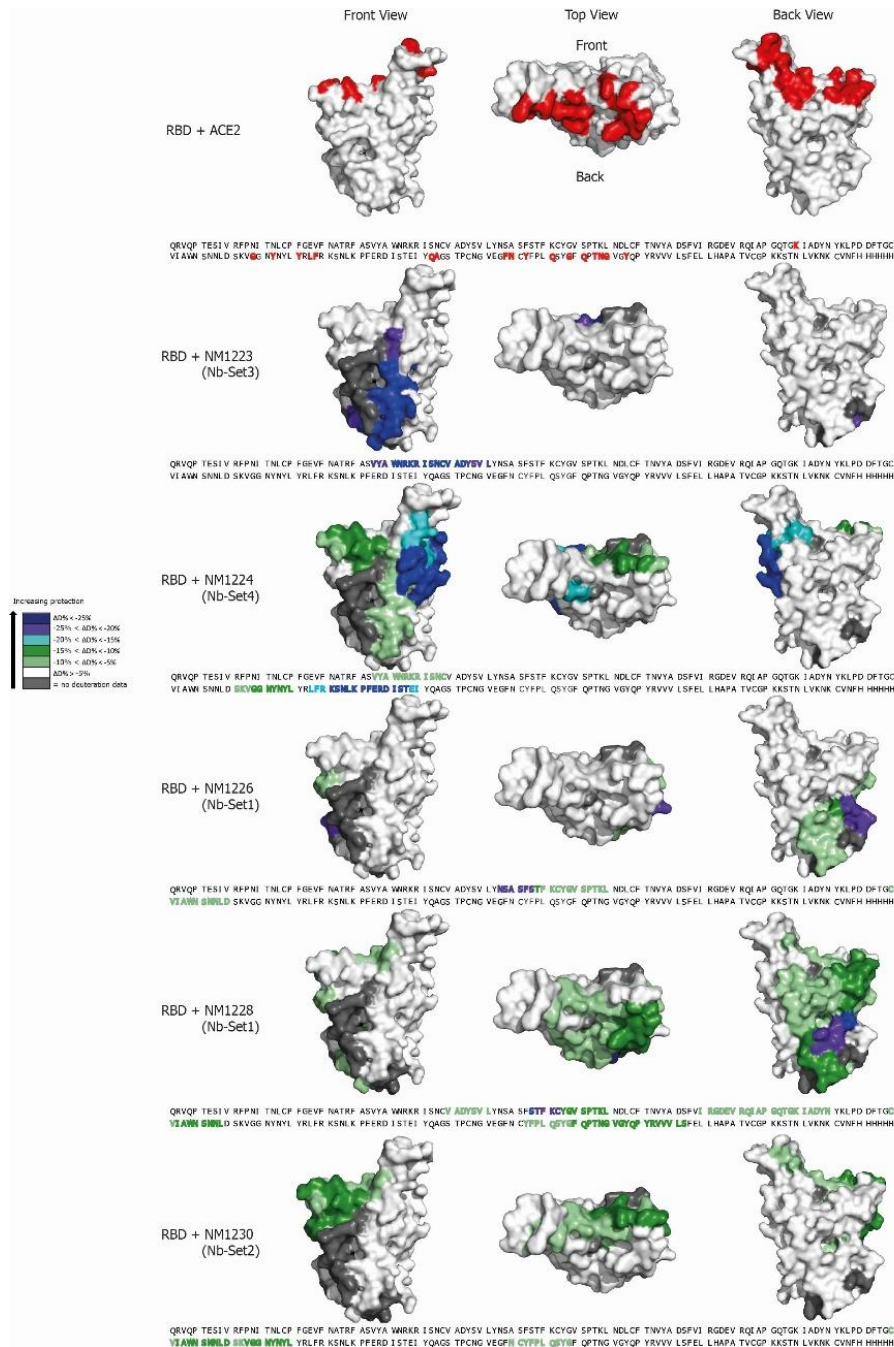

624

## 625 Figure 5: Epitope mapping of Nbs by HDX mass spectrometry

626 Surface structure model of the RBD showing the ACE2 interface and the HDX-MS epitope  
 627 mapping results of NM1223, NM1224, NM1226, NM1228, NM1230. Amino acid residues of  
 628 RBD (PDB 6M17 [2]) involved in the RBD:ACE2 interaction site [2, 35] are shown in red (top  
 629 panel). RBD epitopes protected upon Nb binding are highlighted in different colors indicating  
 630 the strength of protection. Amino acid residues which are part of the Nb epitopes are  
 631 highlighted in the RBD sequence.

632

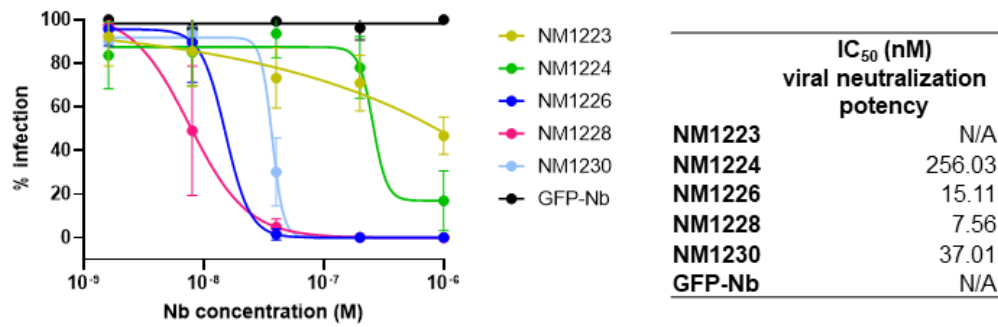

633

634 **Figure 6: Viral neutralization potency of selected Nbs**

635 (A) Inhibition of viral infectivity of the SARS-CoV-2 strain icSARS-CoV-2-mNG was analyzed  
636 in Caco-2 cells using serial dilutions of NM1223, NM1224, NM1226, NM1228 and NM1230. As  
637 negative control GFP-Nb was used. 48 h post-infection neutralization potency was visualized  
638 via Hoechst staining and mNeonGreen expression. Intensities of mNeonGreen signal  
639 normalized to virus-only infection control are illustrated as percent of infection. IC<sub>50</sub> values were  
640 calculated from a four-parametric sigmoidal model and are displayed for each Nb. Data are  
641 presented as mean +/- stds of three technical replicates (n =3).

642

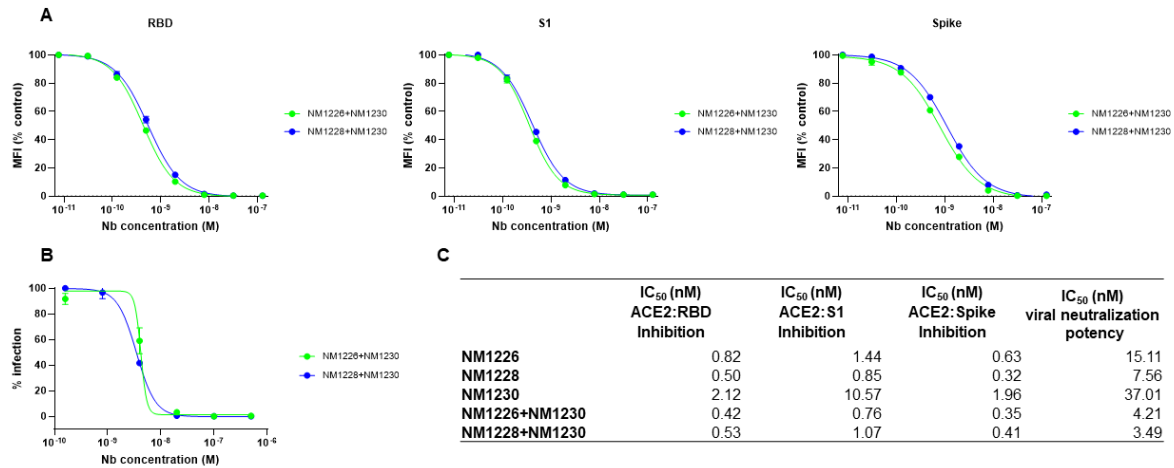

643

644 **Figure 7: Combinatorial application of RBD Nbs for inhibition of ACE2 binding and viral**  
 645 **neutralization**

646 **(A)** Results from multiplex ACE2 competition assay are shown for the three Spike-derived  
 647 antigens: RBD, S1 and homotrimeric Spike. Nb combinations were diluted from 126 nM to 7.69  
 648 pM per Nb in the presence of 80 ng/mL ACE2 and antigen-bound ACE2 was measured. MFI  
 649 signals were normalized to the maximum detectable signal per antigen given by the ACE2-  
 650 only control. IC<sub>50</sub> values were calculated from a four-parametric sigmoidal model. Data are  
 651 presented as mean +/- stds of three technical replicates (n =3). **(B)** Neutralization potency of  
 652 Nb-Set1 (NM1226, NM1228) in combination with Nb-Set2 (NM1230) was analyzed in Caco-2  
 653 cells using the SARS-CoV-2 strain icSARS-CoV-2-mNG. 48 h post-infection neutralization  
 654 potency was visualized via Hoechst staining and mNeonGreen expression. Intensities of  
 655 mNeonGreen signal normalized to virus-only infection control are illustrated as percent of  
 656 infection. IC<sub>50</sub> values were calculated from a four-parametric sigmoidal model and are  
 657 displayed for each Nb. Data are presented as mean +/- stds of two technical replicates (n = 2).  
 658 **(C)** Table summarizing the IC<sub>50</sub> values obtained for the individual Nbs (as shown in **Figure 3**  
 659 and **Figure 6**) and the Nb combinations.

660

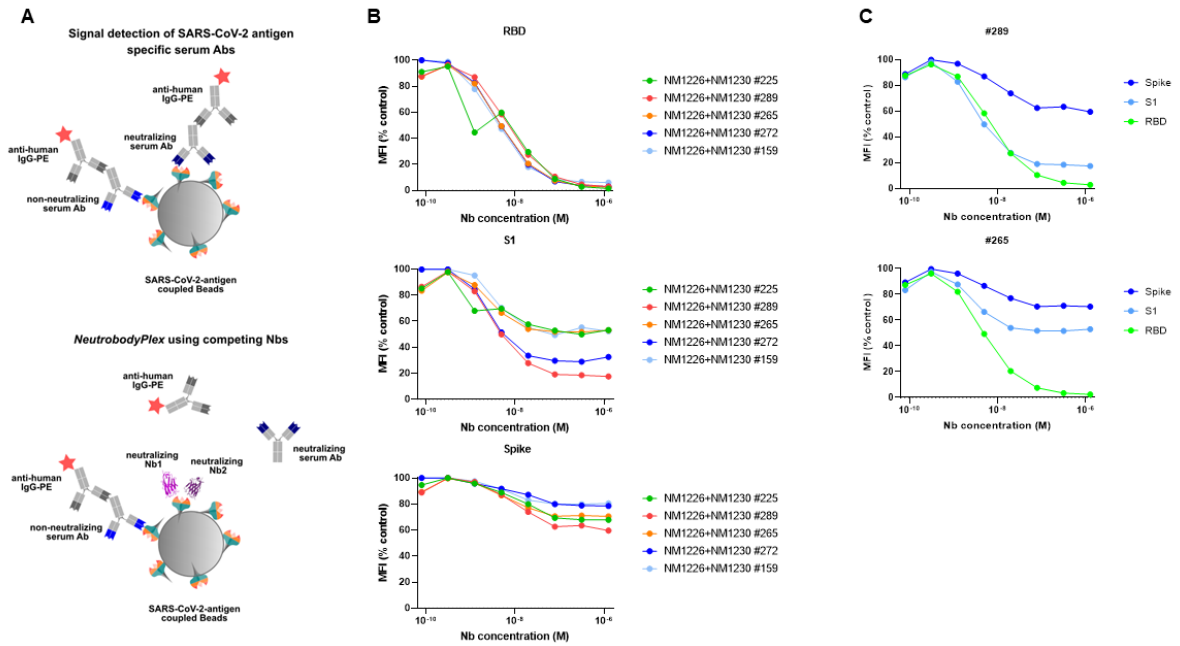

661

662 **Figure 8: The NeurobodyPlex - multiplex competitive binding assay to monitor a**  
 663 **neutralizing immune response in patients**

664 **(A)** Schematic illustration of the NeurobodyPlex. The replacement of neutralizing IgGs from  
 665 patient serum from binding to SARS-CoV-2 derived antigens upon addition of RBD Nbs is  
 666 measured. In presence of neutralizing IgGs, the fluorescent signal from anti-human-IgG-PE, is  
 667 inversely proportional to the applied Nb concentration. **(B)** For the NeurobodyPlex assay serial  
 668 dilutions (1.26  $\mu$ M to 7.69 pM per Nb) of the combination NM1226/ NM1230 were incubated  
 669 with five serum samples followed by detection of bound human IgGs. Shown are MFI signals  
 670 obtained for all three Spike-derived antigens (RBD, S1 domain, homotrimeric Spike)  
 671 normalized to serum-only control. **(C)** For two serum samples (#289, #265) differences in  
 672 competition efficiency between the three Spike-derived antigens are shown.

673

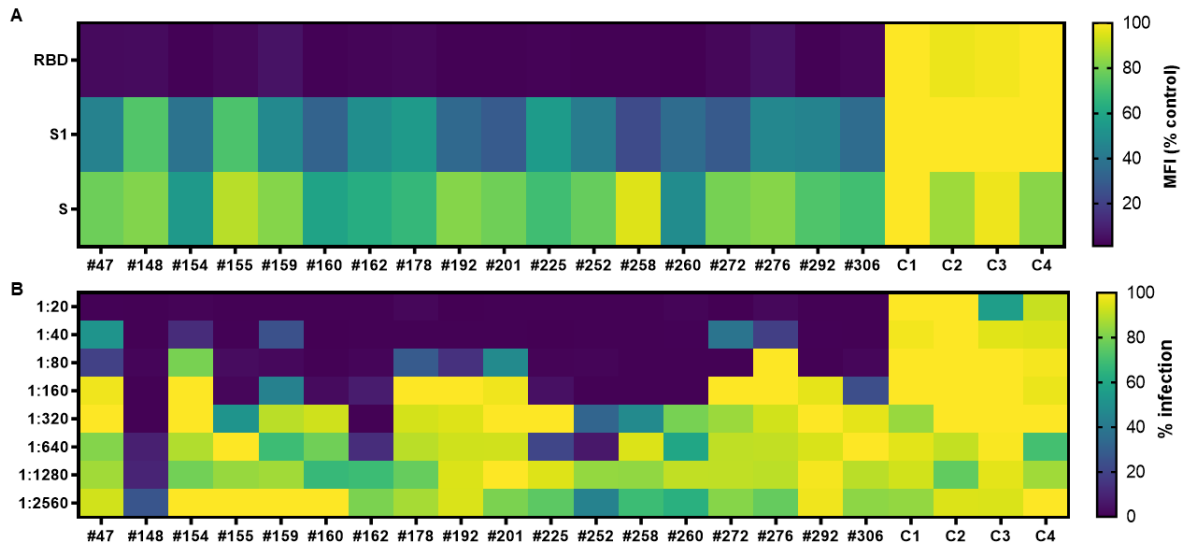

674

675 **Figure 9: NeutrobodyPlex validation by testing patient samples in comparison to viral**  
676 **neutralization assay**

677 (A) 18 serum samples from SARS-CoV-2 convalescent patients and four from healthy donors  
678 were analyzed using the NeutrobodyPlex with fixed concentration of the Nb combination  
679 NM1226/ NM1230 (1.26  $\mu$ M per Nb). MFI values normalized to serum only control are  
680 illustrated as heat map graphic. Dark blue color coding represents loss of the detectable signal,  
681 meaning a strong shift of serum antibodies into the unbound state by off-competition of Nbs.  
682 Yellow color coding represents no signal differences in presence or absence of Nbs.

683 (B) The same serum samples were analyzed using the viral neutralization assay. By infecting  
684 Caco-2 cells with the icSARS-CoV-2-mNG strain in presence of serial dilutions of the serum  
685 samples (1:20-1:2560) the neutralization potency was determined via Hoechst staining and  
686 mNeonGreen expression 48 h post-infection. Intensities of mNeonGreen signal normalized to  
687 virus-only infection control are illustrated as percent of infection in a heat map graphic. Dark  
688 blue color represents low mNeonGreen signal, meaning the presence of neutralizing serum  
689 antibodies. Yellow color coding represents high mNeonGreen signal, indicating a lower  
690 inhibition of viral infection.

691



692 **Supplementary Figures**

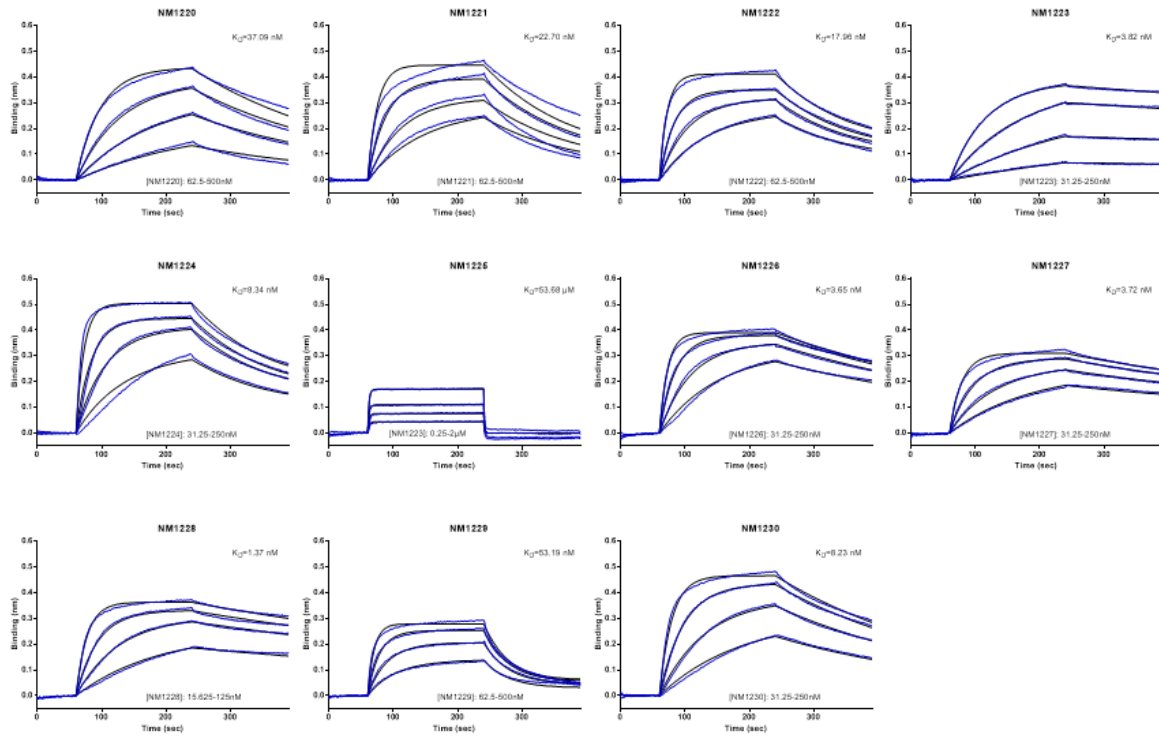

693

694 **Supplementary Figure 1: Affinities of RBD binding Nbs determined by biolayer**  
695 **interferometry**

696 Sensograms of biolayer interferometry-based affinity measurements of 11 identified SARS-  
697 CoV-2 RBD Nbs are shown. For analysis biotinylated RBD was immobilized on streptavidin  
698 biosensors and kinetic measurements were performed by using four concentrations of purified  
699 Nbs ranging from 15.6 nM - 2  $\mu$ M.

700

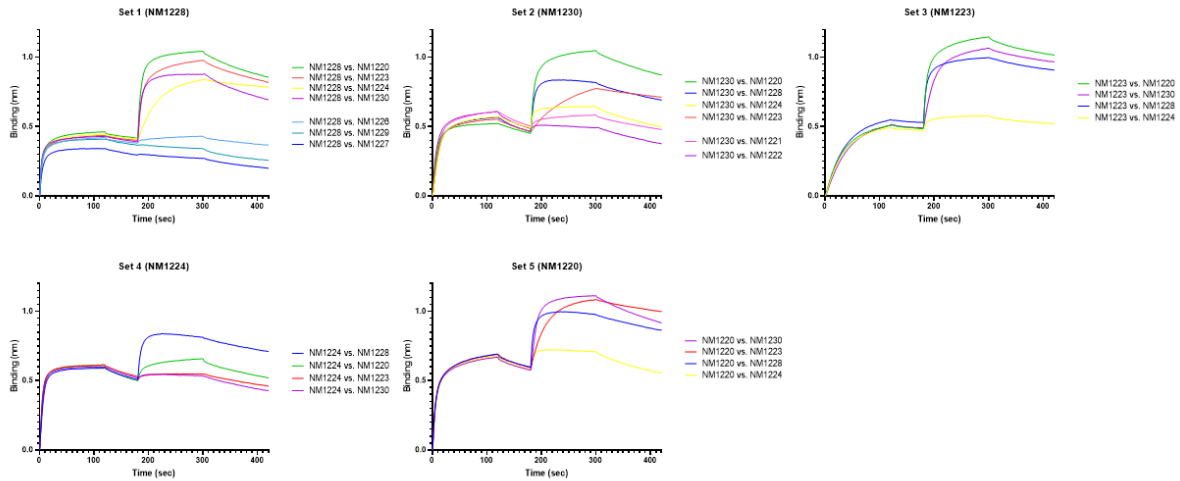

701

## 702 **Supplementary Figure 2: Epitope binning of SARS-CoV-2 RBD Nbs**

703 Sensograms of biolayer interferometry-based epitope binning of dual Nb binding are shown.

704 Biotinylated RBD was immobilized on streptavidin biosensors followed by two consecutive

705 loading steps of different RBD Nbs. Depending on additional loading (different epitope) or non-

706 loading (similar/ overlapping epitope) of the second Nb, Nbs were clustered into different Nb-

707 Sets. Overall, five Nb-Sets were identified. Set 1: NM1228, NM1226, NM1227, NM1229; Set

708 2: NM1230, NM1221, NM1222, Set 3: NM1223; Set 4: NM1224; Set 5: NM1220.

709

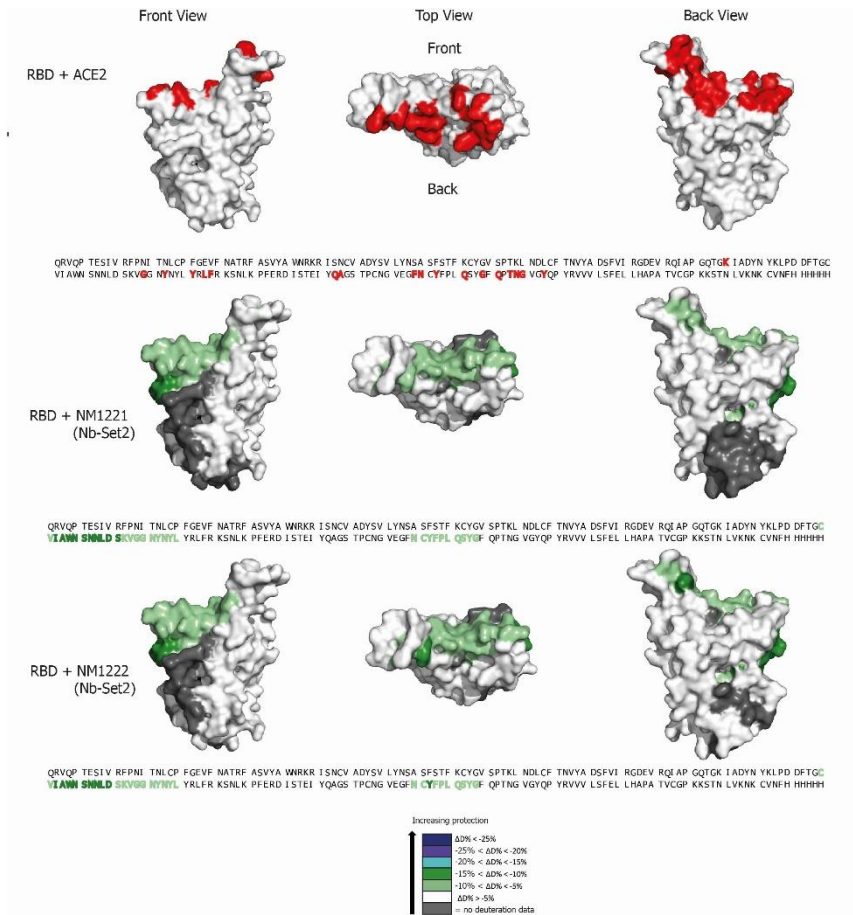

710

711 **Supplementary Figure 3 Epitope mapping of Nbs by HDX mass spectrometry**

712 Surface structure model of the RBD domain showing the ACE2 interface and the HDX-MS  
 713 epitope mapping results of Nb-Set2. Residues of the RBD (PDB 6M17 [2]) responsible for  
 714 contact of the ACE2 [2, 35] are shown in red (top panel). RBD epitopes protected upon binding  
 715 of NM1221, NM1222 and NM1230 are highlighted.

716

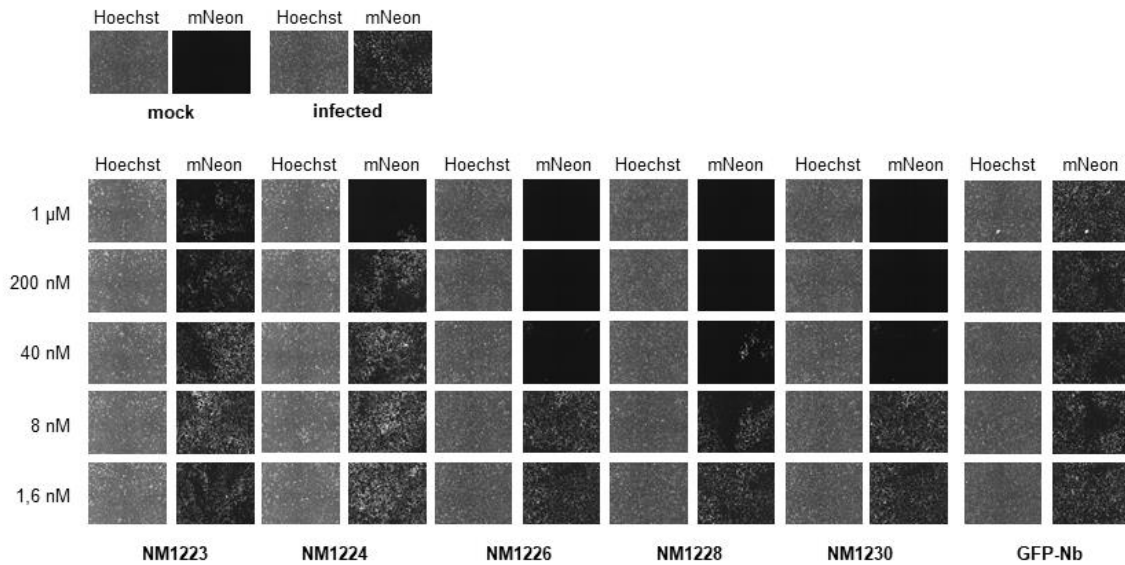

717

#### 718 **Supplementary Figure 4: Viral neutralization potency of selected Nbs**

719 Inhibition of viral infectivity of the SARS-CoV-2 strain icSARS-CoV-2-mNG was analyzed in  
720 Caco-2 cells using serial dilutions of NM1223, NM1224, NM1226, NM1228 and NM1230. As  
721 negative control the GFP-Nb was used. 48 h post-infection neutralization potency was  
722 visualized via Hoechst staining and mNeonGreen expression. Representative images of  
723 human Caco-cells upon infection with SARS-CoV-2 expressing mNeonGreen (icSARS-CoV-  
724 2-mNG) either in presence or absence of serial dilutions of RBD Nbs are shown.

725

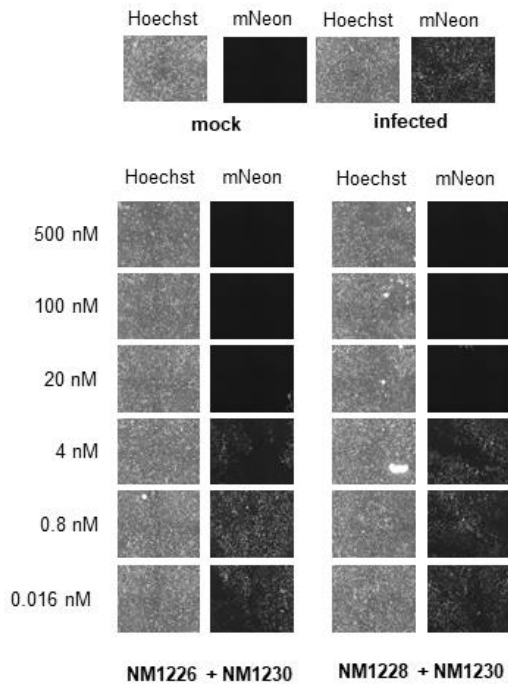

726

#### 727 **Supplementary Figure 5: Viral neutralization with Nb combinations**

728 Inhibition of viral infectivity of the SARS-CoV-2 strain icSARS-CoV-2-mNG was analyzed in  
729 Caco-2 cells using serial dilutions of Nb combinations NM1226/ NM1230 and NM1228/  
730 NM1230. 48 h post-infection neutralization potency was visualized via Hoechst staining and  
731 mNeonGreen expression. Representative images of human Caco-cells upon infection with  
732 SARS-CoV-2 expressing mNeonGreen (icSARS-CoV-2-mNG) either in presence or absence  
733 of serial dilutions of combinations of RBD Nbs are shown.

734

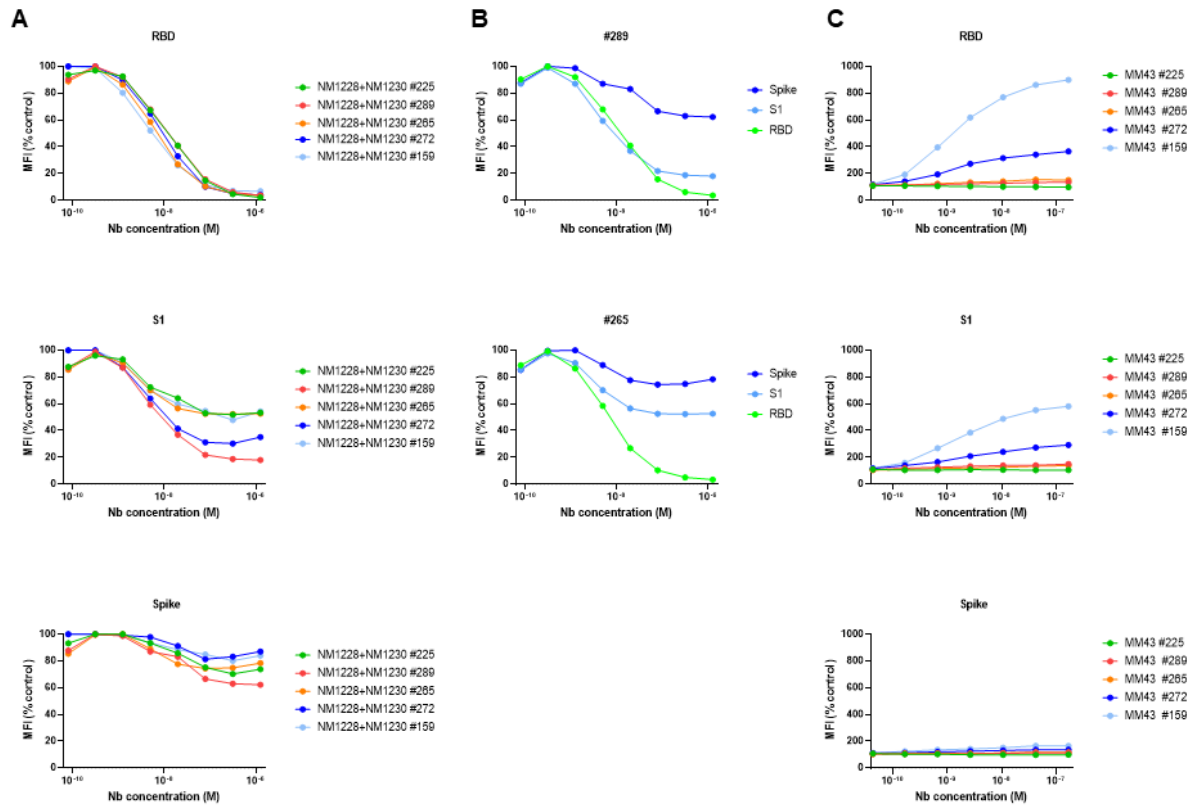

735

736 **Supplementary Figure 6: The NeurobodyPlex - multiplex competitive binding assay to**  
 737 **monitor a neutralizing immune response in patients**

738 **(A)** For the NeurobodyPlex assay serial dilutions (1.26  $\mu$ M to 7.69 pM per Nb) of the  
 739 combination NM1228/ NM1230 were incubated with five serum samples followed by detection  
 740 of bound human IgGs. Shown are MFI signals obtained for all three Spike-derived antigens  
 741 normalized to serum-only control. **(B)** For two serum samples (#289, #265) differences in Nb  
 742 competition efficiency between the three Spike based antigens are shown. **(C)** Curves as  
 743 presented, show normalized MFI signals derived from a similar assay using the neutralizing  
 744 mouse antibody MM43 in concentrations ranging from of 0.17  $\mu$ M to 0.08 nM instead of Nb  
 745 combinations.

746

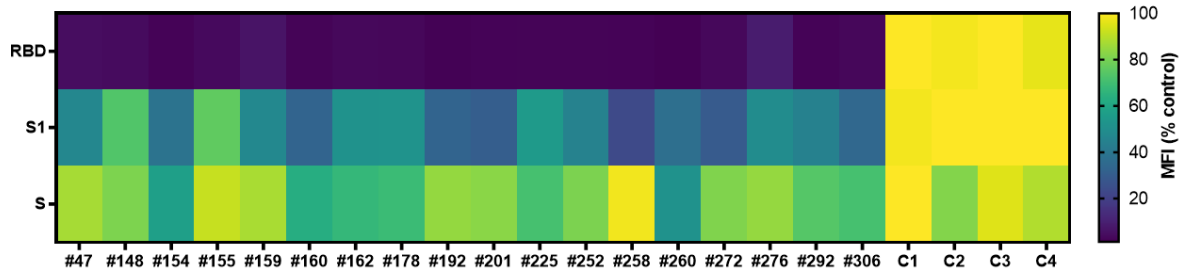

747

748 **Supplementary Figure 7: NeutrobodyPlex validation by testing of patient samples**

749 18 serum samples from SARS-CoV-2 convalescent patients and four from healthy donors were  
750 analyzed using the NeutrobodyPlex using a fixed concentration of the Nb combination  
751 NM1228/ NM1230 (1.26  $\mu$ M per Nb). MFI values normalized to serum only control are  
752 illustrated as heat map graphic. Dark blue color coding represents loss of the detectable signal,  
753 meaning a strong shift of serum antibodies into the unbound state by off-competition of Nbs.  
754 Yellow color coding represents no signal differences in presence or absence of Nbs.

755

756 **References**

- 757 1. Rogers, T.F., et al., *Isolation of potent SARS-CoV-2 neutralizing antibodies and*  
758 *protection from disease in a small animal model*. *Science*, 2020. **369**(6506): p. 956-  
759 963.
- 760 2. Yan, R., et al., *Structural basis for the recognition of SARS-CoV-2 by full-length human*  
761 *ACE2*. *Science*, 2020. **367**(6485): p. 1444-1448.
- 762 3. Ju, B., et al., *Human neutralizing antibodies elicited by SARS-CoV-2 infection*. *Nature*,  
763 2020. **584**(7819): p. 115-119.
- 764 4. Tai, W., et al., *Characterization of the receptor-binding domain (RBD) of 2019 novel*  
765 *coronavirus: implication for development of RBD protein as a viral attachment inhibitor*  
766 *and vaccine*. *Cell Mol Immunol*, 2020. **17**(6): p. 613-620.
- 767 5. Muyldermans, S., *Nanobodies: natural single-domain antibodies*. *Annu Rev Biochem*,  
768 2013. **82**: p. 775-97.
- 769 6. Wrapp, D., et al., *Structural Basis for Potent Neutralization of Betacoronaviruses by*  
770 *Single-Domain Camelid Antibodies*. *Cell*, 2020.
- 771 7. Huo, J., et al., *Neutralizing nanobodies bind SARS-CoV-2 spike RBD and block*  
772 *interaction with ACE2*. *Nat Struct Mol Biol*, 2020.
- 773 8. Schoof, M., et al., *An ultra-high affinity synthetic nanobody blocks SARS-CoV-2*  
774 *infection by locking Spike into an inactive conformation*. *bioRxiv*, 2020.
- 775 9. Chi, X., et al., *Humanized Single Domain Antibodies Neutralize SARS-CoV-2 by*  
776 *Targeting Spike Receptor Binding Domain*. *bioRxiv*, 2020: p. 2020.04.14.042010.
- 777 10. Hanke, L., et al., *An alpaca nanobody neutralizes SARS-CoV-2 by blocking receptor*  
778 *interaction*. *bioRxiv*, 2020: p. 2020.06.02.130161.
- 779 11. Esparza, T.J., et al., *High Affinity Nanobodies Block SARS-CoV-2 Spike Receptor*  
780 *Binding Domain Interaction with Human Angiotensin Converting Enzyme*. *bioRxiv*,  
781 2020: p. 2020.07.24.219857.



- 782 12. Nieto, G.V., et al., *Fast isolation of sub-nanomolar affinity alpaca nanobody against the*  
783 *Spike RBD of SARS-CoV-2 by combining bacterial display and a simple single-step*  
784 *density gradient selection*. bioRxiv, 2020: p. 2020.06.09.137935.
- 785 13. Xiang, Y., et al., *Versatile, Multivalent Nanobody Cocktails for Highly Efficient SARS-*  
786 *CoV-2 Neutralization*. bioRxiv, 2020: p. 2020.08.24.264333.
- 787 14. Gai, J., et al., *A potent neutralizing nanobody against SARS-CoV-2 with inhaled*  
788 *delivery potential*. bioRxiv, 2020: p. 2020.08.09.242867.
- 789 15. Korber, B., et al., *Spike mutation pipeline reveals the emergence of a more*  
790 *transmissible form of SARS-CoV-2*. bioRxiv, 2020: p. 2020.04.29.069054.
- 791 16. Korber, B., et al., *Tracking Changes in SARS-CoV-2 Spike: Evidence that D614G*  
792 *Increases Infectivity of the COVID-19 Virus*. Cell, 2020. **182**(4): p. 812-827 e19.
- 793 17. Amanat, F., et al., *A serological assay to detect SARS-CoV-2 seroconversion in*  
794 *humans*. Nat Med, 2020. **26**(7): p. 1033-1036.
- 795 18. Becker, M., et al., *Going beyond clinical routine in SARS-CoV-2 antibody testing - A*  
796 *multiplex corona virus antibody test for the evaluation of cross-reactivity to endemic*  
797 *coronavirus antigens*. medRxiv, 2020: p. 2020.07.17.20156000.
- 798 19. Gorshkov, K., et al., *Quantum Dot-Conjugated SARS-CoV-2 Spike Pseudo-Virions*  
799 *Enable Tracking of Angiotensin Converting Enzyme 2 Binding and Endocytosis*. ACS  
800 Nano, 2020.
- 801 20. Lassaunière, R., et al., *Evaluation of nine commercial SARS-CoV-2 immunoassays*.  
802 medRxiv, 2020: p. 2020.04.09.20056325.
- 803 21. Robbiani, D.F., et al., *Convergent antibody responses to SARS-CoV-2 in convalescent*  
804 *individuals*. Nature, 2020. **584**(7821): p. 437-442.
- 805 22. Roxhed, N., et al., *A translational multiplex serology approach to profile the prevalence*  
806 *of anti-SARS-CoV-2 antibodies in home-sampled blood*. medRxiv, 2020: p.  
807 2020.07.01.20143966.
- 808 23. Muruato, A.E., et al., *A high-throughput neutralizing antibody assay for COVID-19*  
809 *diagnosis and vaccine evaluation*. Nat Commun, 2020. **11**(1): p. 4059.

- 810 24. Cao, Y., et al., *Potent Neutralizing Antibodies against SARS-CoV-2 Identified by High-*  
811 *Throughput Single-Cell Sequencing of Convalescent Patients' B Cells*. Cell, 2020.  
812 **182**(1): p. 73-84 e16.
- 813 25. Chi, X., et al., *A neutralizing human antibody binds to the N-terminal domain of the*  
814 *Spike protein of SARS-CoV-2*. Science, 2020. **369**(6504): p. 650-655.
- 815 26. Rothbauer, U., *Speed up to find the right ones: rapid discovery of functional*  
816 *nanobodies*. Nat Struct Mol Biol, 2018. **25**(3): p. 199-201.
- 817 27. Tan, C.W., et al., *A SARS-CoV-2 surrogate virus neutralization test based on antibody-*  
818 *mediated blockage of ACE2-spike protein-protein interaction*. Nat Biotechnol, 2020.  
819 **38**(9): p. 1073-1078.
- 820 28. Arbabi Ghahroudi, M., et al., *Selection and identification of single domain antibody*  
821 *fragments from camel heavy-chain antibodies*. FEBS Lett, 1997. **414**(3): p. 521-6.
- 822 29. Kirchhofer, A., et al., *Modulation of protein properties in living cells using nanobodies*.  
823 Nat Struct Mol Biol, 2010. **17**(1): p. 133-8.
- 824 30. Rothbauer, U., et al., *A versatile nanotrap for biochemical and functional studies with*  
825 *fluorescent fusion proteins*. Mol Cell Proteomics, 2008. **7**(2): p. 282-9.
- 826 31. Rothbauer, U., et al., *Targeting and tracing antigens in live cells with fluorescent*  
827 *nanobodies*. Nat Methods, 2006. **3**(11): p. 887-9.
- 828 32. Stadlbauer, D., et al., *SARS-CoV-2 Seroconversion in Humans: A Detailed Protocol for*  
829 *a Serological Assay, Antigen Production, and Test Setup*. Curr Protoc Microbiol, 2020.  
830 **57**(1): p. e100.
- 831 33. Kochert, B.A., et al., *Hydrogen-Deuterium Exchange Mass Spectrometry to Study*  
832 *Protein Complexes*. Methods Mol Biol, 2018. **1764**: p. 153-171.
- 833 34. Hamuro, Y. and S.J. Coales, *Optimization of Feasibility Stage for Hydrogen/Deuterium*  
834 *Exchange Mass Spectrometry*. J Am Soc Mass Spectrom, 2018. **29**(3): p. 623-629.
- 835 35. Lan, J., et al., *Structure of the SARS-CoV-2 spike receptor-binding domain bound to*  
836 *the ACE2 receptor*. Nature, 2020. **581**(7807): p. 215-220.
